# Supplementary material for: Social inequalities in aggravating factors of somatic symptom persistence (SOMA.SOC): study protocol for a mixed-method observational study focusing on irritable bowel syndrome and fatigue
Source: PubMed Central journal article supplement — BMJ Open. 2023 Apr 24;13(4):e070635. doi: 10.1136/bmjopen-2022-070635 (PMC10151849; doi:10.1136/bmjopen-2022-070635), 2023-04-24
Supplement: bmjopen-2022-070635.draft_revisions.pdf [file bmjopen-2022-070635.draft_revisions.pdf]

# BMJ Open

BMJ Open is committed to open peer review. As part of this commitment we make the peer review history of every article we publish publicly available.

When an article is published we post the peer reviewers' comments and the authors' responses online. We also post the versions of the paper that were used during peer review. These are the versions that the peer review comments apply to.

The versions of the paper that follow are the versions that were submitted during the peer review process. They are not the versions of record or the final published versions. They should not be cited or distributed as the published version of this manuscript.

BMJ Open is an open access journal and the full, final, typeset and author-corrected version of record of the manuscript is available on our site with no access controls, subscription charges or pay-per-view fees (<http://bmjopen.bmj.com>).

If you have any questions on BMJ Open's open peer review process please email [info.bmjopen@bmj.com](mailto:info.bmjopen@bmj.com)

# BMJ Open

## **Social inequalities in aggravating factors of somatic symptom persistence (SOMA.SOC): study protocol of a mixed method observational study**

|                               |                                                                                                                                                                                                                                                                                      |
|-------------------------------|--------------------------------------------------------------------------------------------------------------------------------------------------------------------------------------------------------------------------------------------------------------------------------------|
| Journal:                      | <i>BMJ Open</i>                                                                                                                                                                                                                                                                      |
| Manuscript ID                 | bmjopen-2022-070635                                                                                                                                                                                                                                                                  |
| Article Type:                 | Protocol                                                                                                                                                                                                                                                                             |
| Date Submitted by the Author: | 29-Nov-2022                                                                                                                                                                                                                                                                          |
| Complete List of Authors:     | von dem Knesebeck, Olaf; University Medical Center Hamburg-Eppendorf, Institute of Medical Sociology<br>Barbek, Rieke; University Medical Center Hamburg-Eppendorf, Institute of Medical Sociology<br>Makowski, Anna; University Medical Center Hamburg-Eppendorf, Medical Sociology |
| Keywords:                     | EPIDEMIOLOGIC STUDIES, PUBLIC HEALTH, QUALITATIVE RESEARCH, SOCIAL MEDICINE                                                                                                                                                                                                          |
|                               |                                                                                                                                                                                                                                                                                      |

SCHOLARONE™  
Manuscripts

1  
2  
3 **Social inequalities in aggravating factors of somatic symptom persistence (SOMA.SOC): study**  
4 **protocol of a mixed method observational study**  
5  
6  
7

8 Olaf von dem Knesebeck<sup>1\*</sup>, Rieke Barbek<sup>1</sup>, Anna Makowski<sup>1</sup>  
9

10 <sup>1</sup>Institute of Medical Sociology, University Medical Center Hamburg-Eppendorf, Martinistr. 52, 20246  
11 Hamburg  
12  
13  
14  
15  
16

17 Word count (main text): 4,031; tables: 3; figures: 2  
18  
19  
20  
21

22 \*Corresponding author:  
23

24 o.knesebeck@uke.de  
25  
26  
27  
28  
29  
30  
31  
32  
33  
34  
35  
36  
37  
38  
39  
40  
41  
42  
43  
44  
45  
46  
47  
48  
49  
50  
51  
52  
53  
54  
55  
56  
57  
58  
59  
60

## Abstract

Introduction: Some studies indicate that persistent somatic symptoms (PSS) are more prevalent among individuals with a low socioeconomic status (SES) and a migration background. However, factors explaining social inequalities in PSS are largely unknown. It is expected that aggravating factors of PSS like illness perception, illness beliefs (health literacy, stigma), illness behaviour, and health anxiety play an important role for this explanation. The SOMA.SOC study will examine social inequalities (according to SES and migration) in factors contributing to symptom persistence in Irritable Bowel Syndrome (IBS) and fatigue.

Methods and analysis: The project will collect both quantitative and qualitative data. Quantitative data will be gathered via a representative telephone survey in Germany (N=2,400). With a vignette design depicting patients varying in sex, condition (IBS/fatigue), occupational status (low/high), and migration (yes/no), public knowledge and beliefs (e.g. health literacy), attitudes (stigma), and personal experiences with the condition (e.g. somatic symptom burden) will be explored. Complementary, longitudinal qualitative interviews will be conducted with patients (n=32 at three time points, resulting in N=96 interviews) who will also vary according to sex, condition, occupational status and migration. Patients will be recruited from primary care practices in Hamburg. The interviews will cover origin and development of the condition, coping and help-seeking as well as social interactions and perception of the disease by others (e.g. perceived stigma). SOMA.SOC is part of the interdisciplinary research unit "Persistent SOMAtic Symptoms ACROSS Diseases (SOMACROSS)".

Ethics and dissemination: The study protocol was approved by the Ethics Committee of the Hamburg Medical Association on 25 January 2021 (reference number: 2020-10194- BO-ff). The results will help to understand and explain inequalities in PSS and will provide an insight into the social context of PSS.

Key words: social inequalities, socioeconomic status, migration, somatic symptoms, symptom persistence, mixed methods

### Strengths and limitations of this study

- This will be the first study on social inequalities in a range of factors contributing to symptom persistence (aggravating factors) in Irritable Bowel Syndrome (IBS) and fatigue.
- By combining quantitative and qualitative data, we expect a better and more comprehensive understanding of inequalities in aggravating factors of persistent somatic symptoms (PSS).
- With the longitudinal design of the qualitative study part, we expect to gain insight into the course of symptoms and changes of experiences over time.
- Due to the observational design, causal conclusions cannot be drawn from the study.
- As the study is focussed on IBS and fatigue, results cannot be generalized to other PSS.

For peer review only

## Introduction

### Background

#### *Health inequalities according to socioeconomic status and migration*

National and international studies in social epidemiology have consistently shown that socioeconomic status (SES, i.e. education, income, and / or occupational position) as well as migration and ethnicity are important social determinants of health.<sup>1,2</sup> Accordingly, people with a low SES generally experience worse health and wellbeing as well as higher morbidity (including higher risk of chronic disease course) and mortality rates than those with a high SES. Material (e.g. material deprivation, unfavourable working, housing, and neighbourhood conditions), psychosocial (e.g. social isolation, psychosocial stress, coping resources) and behavioural factors (e.g. smoking, exercise, alcohol consumption, nutrition) contribute to the explanation of such health inequalities. Recent studies indicate that differences in knowledge and beliefs about health and illness ("health literacy") are also important for the explanation of health inequalities.<sup>3,4</sup> However, results on the explanatory contribution of these factors are inconsistent as there is variation according to the disease under study. For example, socioeconomic inequalities of coronary heart disease can largely be explained by differences in classic cardiovascular risk factors (i.e. high blood pressure, high cholesterol, diabetes mellitus, and cigarette smoking)<sup>5</sup>, while poorer coping styles, ongoing life events, stress exposure, and weaker social support are important factors to explain the higher prevalences of mental disorders in lower SES groups.<sup>6,7</sup>

Although migrants are often, at least initially, relatively healthy compared with the non-migrant population in the host country, available data suggest that they tend to be more vulnerable to certain communicable diseases, occupational health hazards, injuries, poor mental health, and maternal and child health problems.<sup>2,8</sup> Studies furthermore show that there are large differences between migrants in terms of their socioeconomic situation but these differences and their health-related consequences are far from being adequately understood. As migration status and SES reflect different aspects of social inequalities, that are not independent, it is reasonable to explore both aspects and their relation to health simultaneously.<sup>9</sup>

#### *Social inequalities in somatic symptoms*

Regarding persistent somatic symptoms (PSS), there are a few studies investigating inequalities according to SES and migration. Using German population survey data, Hinz et al.<sup>10</sup> found that a low SES is associated with a higher risk for somatic symptoms measured with the Patient Health Questionnaire (PHQ-15).<sup>11</sup> This result was confirmed by an analysis of the Gutenberg Health Study conducted in the Rhine-Main-Region.<sup>12</sup> Based on the German national Cohort study, Morawa et al.<sup>13</sup> showed that persons of Turkish origin report more symptoms according to the PHQ-15 compared to Germans. Moreover, psychiatric patients with a migration background had a significantly higher current symptom load, especially by somatic symptoms, compared to those without migration background.<sup>14</sup>

Thus, overall, results suggest that somatic symptoms are more prevalent among individuals with a low SES and a migration background in Germany. However, respective empirical studies mostly use sum scales comprising a number of symptoms but magnitude and mechanisms of inequalities may differ depending on symptom under study. Considering specific PSS with high prevalence like fatigue (about 30% in Germany<sup>15,16</sup>) or the Irritable Bowel Syndrome (IBS, about 10-20% in Germany<sup>17</sup>), research on

1  
2  
3 inequalities is scarce, particularly in Germany. Jason et al.<sup>18</sup> found highest levels of fatigue among  
4 minority groups and persons with lower levels of education and occupational status in the US. A  
5 German population study also revealed increased rates of fatigue among low SES groups.<sup>16</sup> Another  
6 study indicates that there are interactions between SES and ethnicity in the association with fatigue.<sup>19</sup>  
7 In terms of IBS, there are studies showing higher prevalences in lower SES groups<sup>20</sup> but others find a  
8 reverse association or no socioeconomic inequalities.<sup>21–23</sup> There is a paucity of data on differences  
9 according to migration status in the epidemiology of IBS.

### 13 *Social inequalities in aggravating factors of PSS*

15 Aetiological models suggest that psychosocial, behavioural, and biomedical factors, as well as their  
16 interaction, contribute to the persistence and aggravation of somatic symptom burden.<sup>24</sup> Among these  
17 aggravating factors are illness beliefs, illness perception, treatment experiences, illness behaviour, and  
18 health anxiety. It can be expected that these factors also play an important role for explaining  
19 inequalities in PSS. However, empirical studies analysing social inequalities in aggravating factors are  
20 scarce and thus, there is not much known about the mechanisms that potentially can explain  
21 inequalities in PSS.

25 Studies on illness beliefs examine to what extent an illness is recognized as such and what beliefs about  
26 the causes, the course and the treatment of this illness are prevalent among the public. In recent years,  
27 these studies have been discussed with reference to the concept of health literacy. Health literacy  
28 entails “the public’s knowledge, motivation, and competence to access, understand, appraise, and  
29 apply health information in order to make judgments and take decisions in everyday life concerning  
30 healthcare”.<sup>25</sup> Deficits in health literacy mean that people do not know what they can do for  
31 prevention, delay or avoid seeking treatment, view recommended treatments with suspicion, or are  
32 unsure how to assist those afflicted.<sup>26</sup> Limited health literacy has been found among people with a low  
33 SES and migrant background.<sup>4,27,28</sup> For example, a study analysing differences between German and  
34 Turkish patients suffering from somatoform disorders showed that Turkish patients believed  
35 significantly stronger in supernatural causes of their disease and that these beliefs reduced the  
36 motivation to take up psychotherapy.<sup>29</sup> A lack of health literacy has been found to be associated with  
37 negative attitudes towards persons with mental illness,<sup>28</sup> which can be conceptualized as public stigma.  
38 This entails reactions of the general public towards a group based on stereotypes about this group. In  
39 this regard, results suggest that respondents with higher SES desire less social distance from the  
40 mentally ill and express more liberal views.<sup>30</sup> Research also suggests that public stigma is perceived  
41 and often internalized by the persons afflicted. Perceived and internalized stigma have been found to  
42 predict worse health outcomes among IBS patients.<sup>31</sup> With regards to fatigue, studies report higher  
43 levels of perceived stigma when compared to IBS<sup>32</sup> and participants report feelings of estrangement  
44 and the belief that others attribute fatigue solely to psychological causes.<sup>33</sup>

52 Only few studies examined inequalities in symptom or illness perception and health anxiety. In terms  
53 of the former, perceived symptom burden seems to be positively associated with education,<sup>34</sup> while  
54 results on differences according to ethnicity and migration are inconsistent.<sup>34,35</sup> As for health anxiety,  
55 a recent meta-analysis showed a lower risk for health anxiety in people with higher socioeconomic  
56 status<sup>36</sup>. Another meta-analysis indicated a higher risk of health anxiety in migrants and ethnic  
57 minorities compared to the majority population in North America.<sup>37</sup> Regarding illness behaviour,  
58 reviews from Germany overall indicate a lower utilization of health care among migrants, although the  
59  
60

1  
2  
3 results vary in terms of health care sector, indicator of health care utilization and migrant population  
4 under study.<sup>38</sup> Low SES groups show lower utilization regarding medical specialist consultations and  
5 prevention services.<sup>39</sup> However, hardly any of the studies included in these reviews specifically address  
6 PSS. Thus, overall, there are some studies indicating social inequalities in aggravating factors. However,  
7 research is fragmented and mostly not related to PSS.  
8  
9

## 10 11 12 **Objectives and hypotheses**

13  
14 Against this background, the present study “Social inequalities in aggravating factors of somatic  
15 symptom persistence (SOMA.SOC)” was developed. The objective of the study is to examine social  
16 inequalities (according to SES and migration) in factors contributing to symptom persistence in IBS and  
17 fatigue. We chose these two specific conditions as they appear relatively frequently in the German  
18 population. In terms of IBS, we especially refer to the cardinal symptoms of recurrent abdominal pain  
19 and altered bowel movements (as specified in the International Classification of Diseases 10<sup>th</sup> Edition,  
20 ICD-10<sup>40</sup>). Regarding fatigue, different symptoms like emotional and cognitive limitations (e.g. lack of  
21 motivation and reduced performance) as well as physical complaints (e.g. muscular weakness) are to  
22 be considered (as mentioned in the national guideline<sup>15</sup> and covered in the ICD-10<sup>40</sup>). The following  
23 aggravating factors will be explored: illness perception, knowledge and beliefs about the symptoms,  
24 illness and treatment experiences, illness behaviour, and health anxiety.  
25  
26  
27  
28

29  
30 More specifically the following hypotheses will be explored: 1) SES and migration are associated with  
31 factors contributing to the symptom persistence (aggravating factors) of IBS and fatigue. 2) There are  
32 differences in perceptions of and beliefs about IBS and fatigue according to the SES and migration  
33 status of the afflicted person.  
34  
35

36 The SOMA.SOC study is part of the interdisciplinary research unit “Persistent SOMAtic symptoms  
37 ACROSS diseases — from risk factors to modification (SOMACROSS)”. SOMACROSS aims to identify  
38 disease-overarching and disease-specific biopsychosocial risk factors and mechanisms for the  
39 persistence of somatic symptoms.<sup>41</sup> SOMACROSS proposes a biopsychosocial ‘PSS working model’ as a  
40 starting point for the investigation of risk factors and aetiological mechanisms, based on the model by  
41 Henningsen et al.<sup>24</sup> The integration of the objectives of the SOMA.SOC project into the working model  
42 of SOMACROSS is shown in Figure 1.  
43  
44

45  
46 (Figure 1 about here)  
47  
48  
49

## 50 **Methods and analysis**

### 51 **Study design and participants**

52  
53 In order to gain insight in social inequalities in aggravating factors of IBS and fatigue, the project will  
54 make use of a mixed methods design by collecting both quantitative and qualitative observational  
55 data. For a better understanding of the methods, in the following, these two study parts (population  
56 survey and qualitative interviews with patients) will be presented separately. The conditions under  
57 study will be conceptualized differently in the two study parts: While we will use vignettes describing  
58 a person with typical symptoms of IBS or fatigue in the population survey, patients diagnosed with one  
59  
60



of the conditions will be recruited for the qualitative interviews. Data collection started in April 2022 and will be finalized in summer 2024.

#### *Population survey*

To explore public knowledge, beliefs, attitudes, and experiences regarding PSS in the case of IBS and fatigue, a representative population survey will be conducted throughout Germany via computer-assisted telephone interviewing (CATI). This cross-sectional survey is going to be representative of the resident population in Germany aged 18 years and older, and utilizes a dual-frame approach, i.e. 30% of the gross sample consists of mobile numbers, while 70% will be selected from landline numbers. Thus, there is greater chance of including mobile-only users as well as target groups otherwise hard to reach. Landline numbers will be drawn from all registered private numbers at random. Additional computer-generated numbers will also allow for ex-directory household. For interviews in households with more than one potential target person, a random selection of the target person is realized using the Kish-Selection-Grid.<sup>42</sup> Regarding mobile telephone connections, the interview will be conducted with the person answering the phone.

(Table 1 about here)

In the beginning of the interview, a case story (vignette) will be presented to the respondents. In the vignette, a person with signs and symptoms indicative of either IBS or fatigue will be described. The vignettes will be varied according to sex (male / female), occupational status (high (lawyer) / low (cleaner)), and migration status (yes / no), resulting in 16 different case stories (please see Table 1 for an overview of the varied factors and Table 2 for resulting vignettes). The vignettes will be designed in cooperation with clinical experts. By combining a vignette design with a representative survey, social inequalities may be examined from two perspectives: first, as social characteristics of the respondents themselves (please see above, hypothesis 1) and second, of the person described in the vignette (hypothesis 2).

(Table 2 about here)

A total of N = 2,400 participants will be included in the national telephone survey. The 16 vignettes will be randomly assigned to the respondents (n = 150 per vignette). A sample size calculation showed that this number is sufficient to identify small sized differences with a statistical power of 80% and a Type-I error of 0.05 when comparing two vignettes with regards to categorical outcomes using  $\chi^2$ -tests. As for continuous outcomes, a sample size of n = 150 per vignette allows for the detection of small to medium effect sizes based on t-tests, linear regression models, or analyses of variance (statistical power 80%, Type-I error = 0.05). Moreover, based on previous studies with a similar design,<sup>43-45</sup> this number of respondents was found to be adequate to detect significant differences in public beliefs between vignettes. Similar surveys with a vignette design resulted in response rates between 48% and 54%.<sup>43-45</sup>

#### *Qualitative patient interviews*

To complement the population perspective and to analyse social inequalities in factors and mechanisms of symptom persistence among patients with IBS and fatigue, qualitative interviews will be conducted using a longitudinal design. Longitudinal qualitative research (LQR) is distinct from other qualitative approaches in the way that it incorporates time into the research process. It opens the possibility to make change (or stability) a key focus in analysis.<sup>46</sup> LQR aims at answering questions regarding lived experiences, e.g. during the course of diseases, and how and why these experiences change over time. Against the background of the ongoing process of persistence of somatic symptoms, LQR will be helpful to capture individual courses, narratives and trajectories.

1  
2  
3 Patients will be recruited from primary care practices in the Hamburg region and will be selected  
4 according to condition (IBS / fatigue), sex (male / female), occupational status (high / low), and  
5 migration status (yes / no). With respect to the occupational status of patients, the International Socio-  
6 Economic Index of Occupational Status (ISEI) according to Ganzeboom et al.<sup>47</sup> will be used as a criterion  
7 for assigning scores. Scores will be dichotomized to obtain groups of high and low occupational  
8 position. Regarding the patients' migration history, we will be adapting the definition of the German  
9 Federal Statistical Office. This states that "A person has a migration background if he or she or at least  
10 one parent was not born with German citizenship".<sup>48</sup> For recruitment of the patients, the authors will  
11 cooperate with the Department of General Practice and Primary Care at the University Medical Center  
12 Hamburg-Eppendorf, which established a physicians' research network. Physicians are listed in a  
13 database that includes contact details of all primary care physicians residing in Hamburg and its  
14 suburbs as well as in adjacent regions (overall about 3,000 primary care physicians). The database  
15 holds information on contact data, structure of the practice (single vs. group practice), physician staff  
16 and involvement in recent research projects. 50 practices will be randomly selected and contacted (for  
17 details please see sample size estimation below and Figure 2).

18  
19  
20  
21  
22 (Figure 2 about here)

23  
24 Semi-structured interviews with 32 patients will be conducted at three measurement points (at the  
25 time of inclusion (t0), after 6 months (t1), and after 12 months (t2)), resulting in 96 interviews. Patients  
26 will be selected based on a purposeful sampling procedure according to the four strata mentioned  
27 above (condition, sex, occupational status, and migration). This procedure was chosen as it is expected  
28 to be useful to analyse social inequalities in factors and mechanisms of symptom persistence. Patients  
29 will be recruited via primary care practices in the Hamburg region. Based on experiences in previous  
30 projects, we expect a participation rate of at least 50% of the randomly selected practices.<sup>49</sup> This will  
31 lead to around 25 practices taking up patient recruitment. We also estimate the participation rate of  
32 the addressed patients at 50%, meaning that the practices will have to contact 96 patients (around  
33 four patients per practice in six months), leading to 48 patients with the required combination of  
34 characteristics who supply informed consent to participate. This will allow for a drop-out rate of  
35 approximately 30% among participants during the course of the study, resulting in n = 32 patients who  
36 will be included in all three measurement points (please see Figure 2). For each of the 16 combinations  
37 (IBS / fatigue), sex (male / female), migration (yes / no), and occupational status (high / low), two semi-  
38 structured interviews will be conducted. This sampling procedure will result in an equal number of  
39 patients (n = 16) in terms of condition, sex, occupational status, and migration status interviewed at  
40 three measurement points.

41  
42  
43  
44  
45 There will be a two-staged recruitment process. The selected practices will be contacted via telephone  
46 by a member of the project group, the project will be briefly explained and the interest in participating  
47 in the study will be assessed. If interested in participation, the practice will receive a detailed study  
48 information, a process description, and a declaration of consent to participate. Moreover, the  
49 participating practices will be provided with all necessary study materials to be handed out to patients  
50 (e.g. study information, privacy statement, short questionnaire to collect necessary patient data (e.g.  
51 name, condition, sex, age, occupation, contact information)).

52  
53  
54 Doctors are asked to inform patients who meet the diagnostic criteria (K58.1 (IBS-D), K58.2 (IBS-C),  
55 K58.3 (IBS-M), K58.8, R53, F48.0, or G93.3 according to ICD-10<sup>40</sup>) about the study when they present  
56 in the practice. Those patients who are interested in participation are requested to return a short  
57 questionnaire with all relevant information about eligibility including contact details to the project  
58 group (either via mail, e-mail or fax). Returned questionnaires will be sorted according to strata  
59 (condition, sex, migration status, occupational position). Thereafter, telephone calls will be conducted  
60 to provide further information if needed and to arrange an interview appointment. Informed consent

1  
2  
3 will be signed by all participating patients. Participants will be free to conduct the interviews in person  
4 or by telephone. To acknowledge their participation and compensate for expenses, each patient will  
5 receive 15€ for each completed interview, the physicians will receive 50€ per patient included in the  
6 study.  
7  
8  
9

## 10 **Patient and public involvement**

11  
12 Patients and public are not involved in setting the research agenda.  
13  
14

## 15 **Assessment and study outcomes**

### 16 *Population survey*

17  
18 The standardized questionnaire used in the telephone survey will cover the following topics (1)  
19 questions referring to knowledge and beliefs about IBS or fatigue, (2) attitudes towards persons  
20 affected from IBS or fatigue (stigma), (3) personal experiences with these symptoms, and (4)  
21 sociodemographic characteristics of respondents (please also see Table 3). In terms of knowledge and  
22 beliefs about IBS or fatigue, health literacy, illness perceptions, and illness beliefs will be assessed.  
23 Regarding personal experiences with the symptoms, questions about illness behaviour, illness and  
24 treatment experiences, somatic symptom burden, and health anxiety will be included.  
25  
26  
27  
28

29 (Table 3 about here)

### 30 *Qualitative patient interviews*

31  
32 Semi-structured interviews will be conducted personally or by telephone (according to patient  
33 preference). To this end, a blend of closed and open-ended questions will be used that can be  
34 accompanied by follow-up questions to further specify mentioned topics. The precise formulation and  
35 order of the questions can be varied. This will allow to cover the main issues with all participants while  
36 also offering flexibility in discussing issues pertinent to individuals. The interviews will have a length of  
37 about 30 minutes and will be audio-recorded upon permission of the patient. A total of three sections  
38 are planned for the interview guide:  
39  
40

41 (1) Origin, causes and development of the disease: Here, aspects of symptom / illness perception as  
42 well course and severity of symptoms and aspects of health anxiety will be covered.  
43

44 (2) Coping with the illness and help-seeking: In this segment, illness behaviour and experiences, health  
45 literacy as well as treatment experiences and treatment expectations will be focused.  
46

47 (3) Social interaction and perception by others: This complex will cover disclosure of illness and  
48 (perceived) stigma associated with the disorder.  
49  
50

## 51 **Data analyses**

### 52 *Population survey*

53  
54 Associations between social characteristics of the respondents and aggravating factors will be analysed  
55 by calculating regression models (hypothesis 1). Differences in perceptions, attitudes, and beliefs  
56 according to migration and occupational status of the person in the vignette (hypothesis 2) will be  
57 examined using analyses of variance. The power calculation showed that the sample size is sufficient  
58  
59  
60

1  
2  
3 to detect significant main effects (e.g. of migration status of the person in the vignette) as well as two-  
4 way interactions (e.g. between migration and occupational status). In terms of the latter, interaction  
5 tests will be performed. Regarding categorical outcomes (e.g. recognition of condition presented in  
6 the vignette (yes or no)),  $\chi^2$ -tests will be applied. Missing data will be imputed if more than 5% of the  
7 data are missing. The number of imputations will be chosen dependent on the proportion of missing  
8 data.  
9

### 10 11 *Qualitative patient interviews*

12  
13 Subject to the consent of the participants, the interviews will be audio-recorded. Uniform transcription  
14 rules will be established before the start of the analysis, and compliance with these rules will be  
15 checked several times during the course of the process. For the analysis of the transcribed interviews,  
16 qualitative content analysis (QCA) will be used. A core aspect of QCA is to make the interpretation of  
17 text describable and verifiable by using content analysis rules previously formulated on the basis of a  
18 work plan. The technique of inductive category formation is particularly suitable for this study design.  
19 Inductive categories are developed from the interview material according to a given definition  
20 criterion, in order to reach the central aspects of the text. Step by step, categories will be formulated,  
21 which are revised within feedback loops eventually reduced to main categories and checked in respect  
22 to their reliability.<sup>54</sup>  
23  
24

25  
26 The data from both study parts are seen as two complementing perspectives on social aspects that  
27 contribute to the symptom persistence of IBS and fatigue. In using these different approaches, we  
28 expect a better and more comprehensive understanding of inequalities in aggravating factors of PSS  
29 and how they are associated with patients' and the public's characteristics.  
30  
31  
32

### 33 **Ethics and dissemination**

34  
35 The study is based on data of personal or telephone interviews. Thus, ethical and legal considerations  
36 are focused on data protection. We will strictly adhere to data protection regulations. Informed  
37 consent will be obtained from all participants. Respondents will be informed that participation in the  
38 study is voluntary and that withdrawal is possible at any time. There are no specific risks for the  
39 participants in the study. The study protocol was approved by the Ethics Committee of the Hamburg  
40 Medical Association on 25 January 2021 (reference number: 2020-10194- BO-ff).  
41  
42

43 In accordance with the ethics committee approval and the German Research Foundation (DFG)  
44 guidelines for the handling of research data, deidentified quantitative individual data will be made  
45 publicly available. Data sharing will follow the FAIR Data Principles (Findable, Accessible, Interoperable  
46 and Reusable). The main findings will be submitted for publication in peer-reviewed journals within 12  
47 months of study completion.  
48  
49  
50

### 51 **Conclusion**

52  
53 To our knowledge, this will be the first study on social inequalities in a range of factors contributing to  
54 symptom persistence (aggravating factors) in IBS and fatigue. The results will help us to understand  
55 and explain inequalities in PSS and will provide an insight into the social context of PSS. Moreover,  
56 illness perception, knowledge, beliefs, experiences and stigmatising attitudes are expected to be  
57 important to understand the mechanism of symptom persistence, especially among low SES and ethnic  
58 minority groups. By using a population perspective, public beliefs about PSS can be assessed that may  
59 have an impact on help seeking behaviour, symptom course, and outcomes. Results can be integrated  
60

1  
2  
3  
4  
5  
6  
7  
8  
9  
10  
11  
12  
13  
14  
15  
16  
17  
18  
19  
20  
21  
22  
23  
24  
25  
26  
27  
28  
29  
30  
31  
32  
33  
34  
35  
36  
37  
38  
39  
40  
41  
42  
43  
44  
45  
46  
47  
48  
49  
50  
51  
52  
53  
54  
55  
56  
57  
58  
59  
60

into concepts of prevention and treatment of PSS, e.g. by improving public knowledge and reducing stigma.

For peer review only

1  
2  
3 **Acknowledgements:** We would like to acknowledge the continued contributions of all colleagues of  
4 the Research Unit 5211 'SOMACROSS' (FOR 5211) to the design of this study.  
5

6 **Contributors:** OvdK and AM developed the study. OvdK is the principal investigator of the study. RB  
7 is research associate in the study. All authors contributed to the refinement of the study protocol,  
8 read and approved the final version.  
9

10 **Funding:** The SOMA.SOC study is supported by the German Research Foundation (Deutsche  
11 Forschungsgemeinschaft, DFG) (project number: 445297796, please see  
12 <https://gepris.dfg.de/gepris/projekt/460374208?language=en>). It is part of the collaborative research  
13 unit 5211 (RU 5211) "Persistent SOMAtic symptoms ACROSS diseases: from risk factors to  
14 modification (SOMACROSS)" also funded by the DFG (spokesperson: Professor Bernd Löwe, MD).  
15  
16

17 **Competing interests:** None declared.  
18

19 **Patient and public involvement:** Patients and/or the public were not involved in the design, or  
20 conduct, or reporting, or dissemination plans of this research.  
21

22 **Patient consent for publication:** Not applicable.  
23

24 **Provenance and peer review:** Not commissioned; peer reviewed for ethical and funding approval  
25 prior to submission.  
26  
27  
28  
29  
30  
31  
32  
33  
34  
35  
36  
37  
38  
39  
40  
41  
42  
43  
44  
45  
46  
47  
48  
49  
50  
51  
52  
53  
54  
55  
56  
57  
58  
59  
60

## References

1. Marmot M. Social determinants of health inequalities. *Lancet*. 2005;365:1099–104.
2. Rechel B, Mladovsky P, Ingleby D, et al. Migration and health in an increasingly diverse Europe. *Lancet*. 2013;381:1235–45.
3. World Health Organization. Health Literacy. The Solid Facts [Internet]. 2013. Available from: <https://apps.who.int/iris/bitstream/handle/10665/128703/e96854.pdf>
4. von dem Knesebeck O, Mnich E, Daubmann A, et al. Socioeconomic status and beliefs about depression, schizophrenia and eating disorders. *Soc Psychiatry Psychiatr Epidemiol*. 2013;48(5):775–82.
5. Kivimäki M, Shipley MJ, Ferrie JE, et al. Best-practice interventions to reduce socioeconomic inequalities of coronary heart disease mortality in UK: a prospective occupational cohort study. *Lancet*. 2008;372(9650):1648–54.
6. Lorant V, Deliège D, Eaton W, et al. Socioeconomic inequalities in depression: A meta-analysis. *Am J Epidemiol*. 2003;157(2):98–112.
7. Muntaner C, Eaton WW, Miech R, et al. Socioeconomic position and major mental disorders. *Epidemiol Rev*. 2004;26:53–62.
8. Razum O, Karrasch L, Spallek J. [Migration. A neglected dimension]. *Bundesgesundheitsblatt - Gesundheitsforsch - Gesundheitsschutz*. 2016;59:259–65.
9. Malmusi D, Borrell C, Benach J. Migration-related health inequalities: Showing the complex interactions between gender, social class and place of origin. *Soc Sci Med*. 2010;71(9):1610–9.
10. Hinz A, Ernst J, Glaesmer H, et al. Frequency of somatic symptoms in the general population: Normative values for the Patient Health Questionnaire-15 (PHQ-15). *J Psychosom Res*. 2017;96(August 2011):27–31.
11. Kroenke K, Spitzer RL, Williams JBW, et al. The Patient Health Questionnaire Somatic, Anxiety, and Depressive Symptom Scales: A systematic review. *Gen Hosp Psychiatry*. 2010;32(4):345–59.
12. Beutel ME, Wiltink J, Kerahrodi JG, et al. Somatic symptom load in men and women from middle to high age in the Gutenberg Health Study - association with psychosocial and somatic factors. *Sci Rep*. 2019;9(4610):1–9.
13. Morawa E, Dragano N, Jöckel K-H, et al. Somatization among persons with Turkish origin: Results of the pretest of the German National Cohort Study. *J Psychosom Res*. 2017;96:1–9.
14. Brandl EJ, Dietrich N, Mell N, et al. Clinical and sociodemographic differences between patients with and without migration background in a psychiatric outpatient service. *Psychiatr Prax*. 2018;45:367–74.
15. Baum E, Donner-Banzhoff N, Maisel P. [Fatigue] [S3-Guideline]. 2017.
16. Kocalevent RD, Hinz A, Brähler E, et al. Determinants of fatigue and stress. *BMC Res Notes*. 2011;4(238).
17. [Federal Ministry of Health]. [Irritable Bowel Syndrome] [Internet]. 2020. Available from: <https://gesund.bund.de/reizdarmsyndrom>
18. Jason LA, Richman JA, Rademaker AW, et al. A community-based study of Chronic Fatigue Syndrome. *Arch Intern Med*. 1999;159:2129–37.
19. Bardwell WA, Burke SC, Thomas KS, et al. Fatigue varies by social class in African Americans but not Caucasian Americans. *Int J Behav Med*. 2006;13(3):252–8.
20. Spiegel BMR. The burden of IBS: Looking at metrics. *Curr Gastroenterol Rep*. 2009;11:265–9.
21. Canavan C. The epidemiology of irritable bowel syndrome. *Clin Epidemiol*. 2014;6:71–80.
22. Lovell RM, Ford AC. Global prevalence of and risk factors for irritable bowel syndrome: A meta-analysis. *Clin Gastroenterol Hepatol*. 2012;10:712–21.



23. Howell S, Talley N, Quine S, et al. The irritable bowel syndrome has origins in the childhood socioeconomic environment. *Am J Gastroenterol*. 2004;99(8):1572–8.
24. Henningsen P, Zipfel S, Sattel H, et al. Management of functional somatic syndromes and bodily distress. *Psychother Psychosom*. 2018;87:12–31.
25. Sørensen K, Van Den Broucke S, Fullam J, et al. Health literacy and public health: A systematic review and integration of definitions and models. *BMC Public Health*. 2012;12(1).
26. Jorm AF. Mental health literacy: empowering the community to take action for better mental health. *Am Psychol*. 2012;67(3):231–43.
27. Bostock S, Steptoe A. Association between low functional health literacy and mortality in older adults: longitudinal cohort study. *BMJ Open*. 2012;344(e1602):1–10.
28. Holman D. Exploring the relationship between social class, mental illness stigma and mental health literacy using British national survey data. *Health (Irvine Calif)*. 2015;19(4):413–29.
29. Reich H, Bockel L, Mewes R. Motivation for psychotherapy and illness beliefs in Turkish immigrant inpatients in Germany: Results of a cultural comparison study. *J Racial Ethn Heal Disparities*. 2015;2(1):112–23.
30. Angermeyer MC, Dietrich S. Public beliefs about and attitudes towards people with mental illness: A review of population studies. *Acta Psychiatr Scand*. 2006;113(3):163–79.
31. Taft TH, Riehl ME, Dowjotas KL, et al. Moving beyond perceptions: internalized stigma in the irritable bowel syndrome. *Neurogastroenterol Motil*. 2014;26:1026–35.
32. Looper KJ, Kirmayer LJ. Perceived stigma in functional somatic syndromes and comparable medical conditions. *J Psychosom Res*. 2004;57:373–8.
33. Green J, Romei J, Natelson BH. Stigma and Chronic Fatigue Syndrome. *J Chronic Fatigue Syndr*. 1999;5(2):63–75.
34. Luo H, Lindell DF, Jurgens CY, et al. Symptom perception and influencing factors in chinese patients with heart failure: A preliminary exploration. *Int J Environ Res Public Health*. 2020;17(2692).
35. Wilkins SS, Bourke P, Salam A, et al. Functional stroke mimics: Incidence and characteristics at a primary stroke center in the Middle East. *Psychosom Med*. 2018;80:416–21.
36. Barbek R, Makowski A, von dem Knesebeck O. Social inequalities in health anxiety: A systematic review and meta-analysis. *J Psychosom Res*. 2022;153: 960256.
37. Barbek R, Henning S, Ludwig J, et al. Ethnic and migration-related inequalities in health anxiety: A systematic review and meta-analysis. *Front Psychol*. 2022;13:960256.
38. Klein J, von dem Knesebeck O. Inequalities in health care utilization among migrants and non-migrants in Germany: a systematic review. *Int J Equity Health*. 2018;17(160):1–10.
39. Klein J, von dem Knesebeck O. [Social disparities in outpatient and inpatient care. An overview of current findings in Germany]. *Bundesgesundheitsblatt - Gesundheitsforsch - Gesundheitsschutz*. 2016;2:238–44.
40. Deutsches Institut für Medizinische Dokumentation und Information. ICD-10-WHO Version 2019 [Internet]. Available from: <https://www.dimdi.de/static/de/klassifikationen/icd/icd-10-who/kode-suche/htmlamtl2019/>
41. Löwe B, Andresen V, Van den Bergh O, et al. Persistent SOMATIC symptoms ACROSS diseases - from risk factors to modification: scientific framework and overarching protocol of the interdisciplinary SOMACROSS research unit (RU 5211). *BMJ Open*. 2022;12(1):e057596.
42. Kish L. A procedure for objective respondent selection within the household. *J Am Stat Assoc*. 1949;44(247):380–7.
43. Makowski AC, Mnich EE, Ludwig J, et al. Changes in beliefs and attitudes toward people with depression and schizophrenia - results of a public campaign in Germany. *Psychiatry Res*. 2016;237.



- 1  
2  
3 44. von dem Knesebeck O, Kofahl C, Makowski AC. Differences in depression stigma towards  
4 ethnic and socio-economic groups in Germany - Exploring the hypothesis of double stigma. *J*  
5 *Affect Disord.* 2017;208:82–6.  
6  
7 45. von dem Knesebeck O, Löwe B, Lehmann M, et al. Public beliefs about somatic symptom  
8 disorders. *Front Psychiatry.* 2018;9:1–7.  
9  
10 46. Calman L, Brunton L, Molassiotis A. Developing longitudinal qualitative designs: Lessons  
11 learned and recommendations for health services research. *BMC Med Res Methodol.*  
12 2013;13:14.  
13  
14 47. Ganzeboom HBG, De Graaf PM, Treiman DJ. A standard international socio-economic index of  
15 occupational status. *Soc Sci Res.* 1992;21:1–56.  
16  
17 48. destatis. Population with migration background - Results of the microcensus 2019 - Series 1  
18 Section 2.2. 2020.  
19  
20 49. Koens S, Marx G, Gras C, et al. Physicians' information seeking behavior in patients presenting  
21 with heart failure symptoms – Does gender of physician and patient matter ? *Patient Education*  
22 *Couns.* 2020;103:2437-2442.  
23  
24 50. Broadbent E, Petrie KJ, Main J, et al. The Brief Illness Perception Questionnaire. *J Psychosom*  
25 *Res.* 2006;60:631–7.  
26  
27 51. Jones MP, Keefer L, Bratten J, et al. Development and initial validation of a measure of  
28 perceived stigma in irritable bowel syndrome. *Psychol Health Med.* 2009;14(3):367–74.  
29  
30 52. Gierk B, Kohlmann S, Kroenke K, et al. The Somatic Symptom Scale-8 (SSS-8): A brief measure  
31 of somatic symptom burden. *JAMA Intern Med.* 2014;174(3):399–407.  
32  
33 53. Fink P, Ewald H, Jensen J, et al. Screening for somatization and hypochondriasis in primary care  
34 and neurological in-patients: A seven-item scale for hypochondriasis and somatization. *J*  
35 *Psychosom Res.* 1999;46(3):261–73.  
36  
37 54. Mayring P, Brunner E. [Qualitative Content Analysis]. In: Buber R, Holz Müller HH, editors.  
38 [Qualitative market research: Concepts - Methods - Analyses] 2007. p. 669–80.  
39  
40  
41  
42  
43  
44  
45  
46  
47  
48  
49  
50  
51  
52  
53  
54  
55  
56  
57  
58  
59  
60

Table 1: Factors presented in the vignettes

| Factor              | Specifications                 |                           |
|---------------------|--------------------------------|---------------------------|
| Condition           | Irritable Bowel Syndrome (IBS) | Fatigue (Fa)              |
| Sex                 | Male (M)                       | Female (F)                |
| Migration history   | Migration history (Mh)         | No Migration history (nM) |
| Occupational status | High (Lawyer, L)               | Low (Cleaner, C)          |

For peer review only

Table 2: Vignettes presented in the survey

| Vignette No. | Factor combination |
|--------------|--------------------|
| 1            | IBS M Mh L         |
| 2            | IBS M nM L         |
| 3            | IBS M Mh C         |
| 4            | IBS M nM C         |
| 5            | IBS F Mh L         |
| 6            | IBS F nM L         |
| 7            | IBS F Mh C         |
| 8            | IBS F nM C         |
| 9            | Fa M Mh L          |
| 10           | Fa M nM L          |
| 11           | Fa M Mh C          |
| 12           | Fa M nM C          |
| 13           | Fa F Mh L          |
| 14           | Fa F nM L          |
| 15           | Fa F Mh C          |
| 16           | Fa F nM C          |

For abbreviations of the factor combinations please see Table 1.

Table 3: Instruments intended to use in the population survey

|            | Construct              | Indicator/Instrument                                                                                                                     |
|------------|------------------------|------------------------------------------------------------------------------------------------------------------------------------------|
| <b>(1)</b> | Health literacy        | Labelling (recognition of disease); perceived causes; treatability; effectiveness of treatment options                                   |
|            | Illness perception     | Illness Perception Questionnaire (brief version, IPQ-B) <sup>50</sup>                                                                    |
|            | Illness belief         | E.g. "Do you think that the person in the vignette has a real disorder?"                                                                 |
| <b>(2)</b> | Public stigma          | Emotional reactions towards those affected by IBS or fatigue<br>Stereotypes ascribed to persons with IBS or fatigue                      |
|            | Perceived stigma       | Modified version of the IBS Stigma Scale <sup>51</sup>                                                                                   |
| <b>(3)</b> | Illness behaviour      | E.g. "If you have the feeling of being affected by such complaints, you should get help as soon as possible."<br>Health care utilization |
|            | Illness experience     | Own affliction; contact to someone affected                                                                                              |
|            | Treatment experience   | Treatment experience                                                                                                                     |
|            | Somatic symptom burden | Somatic Symptom Scale (SSS-8) <sup>52</sup>                                                                                              |
|            | Health anxiety         | Whiteley Index (WI-7) <sup>53</sup>                                                                                                      |
| <b>(4)</b> | Sociodemographic data  | Age, sex, educational attainment, occupational position, income, migration status, marital status                                        |

1  
2  
3  
4  
5 Figure 1: Integration of the study objectives into the working model of the Research unit “Persistent  
6 SOMAtic symptoms ACROSS diseases — from risk factors to modification (SOMACROSS)”<sup>41</sup>  
7  
8  
9  
10

11  
12 Figure 2: Two-stage recruitment process of patients for the qualitative interviews via primary care  
13 practices in Hamburg  
14  
15  
16  
17  
18  
19  
20  
21  
22  
23  
24  
25  
26  
27  
28  
29  
30  
31  
32  
33  
34  
35  
36  
37  
38  
39  
40  
41  
42  
43  
44  
45  
46  
47  
48  
49  
50  
51  
52  
53  
54  
55  
56  
57  
58  
59  
60

For peer review only

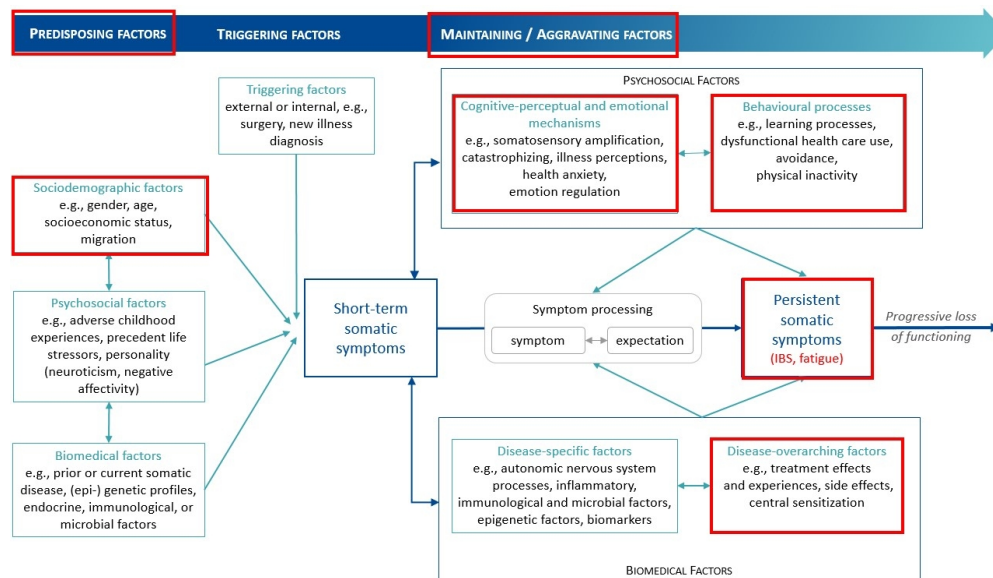

Figure 1: Integration of the study objectives into the working model of the Research unit "Persistent SOMatic symptoms ACROSS diseases – from risk factors to modification (SOMACROSS)" 41

340x200mm (96 x 96 DPI)

1  
2  
3  
4  
5  
6  
7  
8  
9  
10  
11  
12  
13  
14  
15  
16  
17  
18  
19  
20  
21  
22  
23  
24  
25  
26  
27  
28  
29  
30  
31  
32  
33  
34  
35  
36  
37  
38  
39  
40  
41  
42  
43  
44  
45  
46  
47  
48  
49  
50  
51  
52  
53  
54  
55  
56  
57  
58  
59  
60

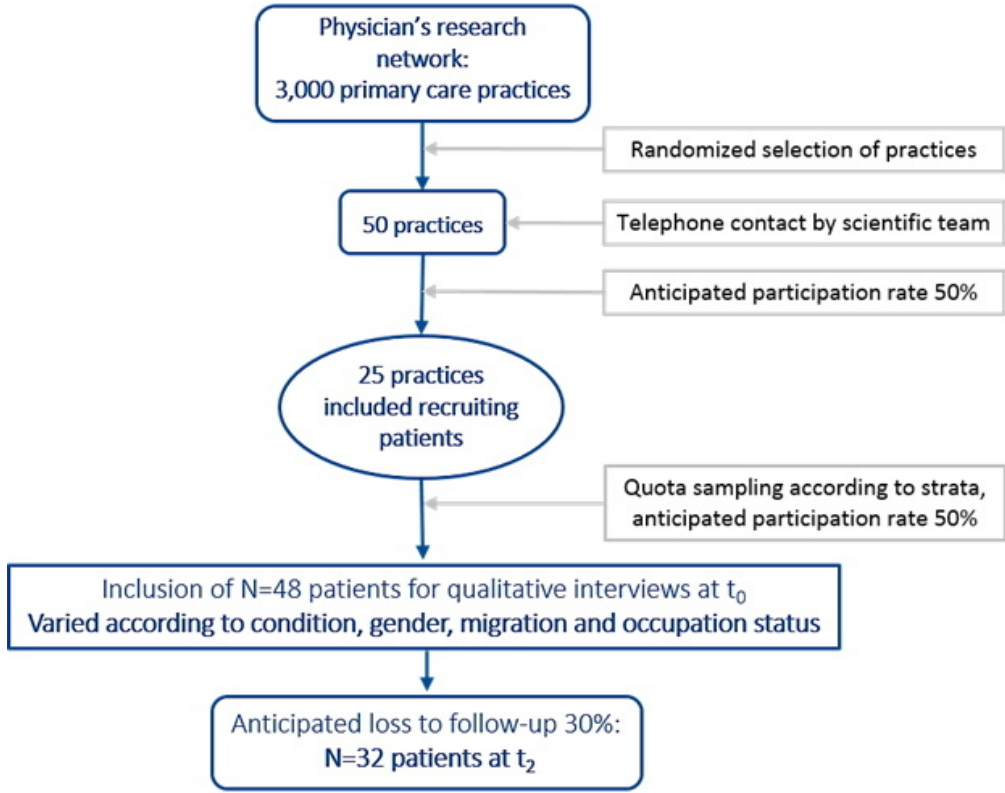

Figure 2: Two-stage recruitment process of patients for the qualitative interviews via primary care practices in Hamburg

164x129mm (96 x 96 DPI)

# BMJ Open

## Social inequalities in aggravating factors of somatic symptom persistence (SOMA.SOC): study protocol of a mixed method observational study focussing on irritable bowel syndrome and fatigue

|                                 |                                                                                                                                                                                                                                                                                      |
|---------------------------------|--------------------------------------------------------------------------------------------------------------------------------------------------------------------------------------------------------------------------------------------------------------------------------------|
| Journal:                        | <i>BMJ Open</i>                                                                                                                                                                                                                                                                      |
| Manuscript ID                   | bmjopen-2022-070635.R1                                                                                                                                                                                                                                                               |
| Article Type:                   | Protocol                                                                                                                                                                                                                                                                             |
| Date Submitted by the Author:   | 24-Mar-2023                                                                                                                                                                                                                                                                          |
| Complete List of Authors:       | von dem Knesebeck, Olaf; University Medical Center Hamburg-Eppendorf, Institute of Medical Sociology<br>Barbek, Rieke; University Medical Center Hamburg-Eppendorf, Institute of Medical Sociology<br>Makowski, Anna; University Medical Center Hamburg-Eppendorf, Medical Sociology |
| <b>Primary Subject Heading</b>: | Public health                                                                                                                                                                                                                                                                        |
| Secondary Subject Heading:      | Sociology                                                                                                                                                                                                                                                                            |
| Keywords:                       | EPIDEMIOLOGIC STUDIES, PUBLIC HEALTH, QUALITATIVE RESEARCH, SOCIAL MEDICINE                                                                                                                                                                                                          |
|                                 |                                                                                                                                                                                                                                                                                      |

SCHOLARONE™  
Manuscripts



1  
2  
3 **Social inequalities in aggravating factors of somatic symptom persistence (SOMA.SOC): study**  
4 **protocol of a mixed method observational study focussing on irritable bowel syndrome and fatigue**  
5  
6  
7

8 Olaf von dem Knesebeck<sup>1\*</sup>, Rieke Barbek<sup>1</sup>, Anna Makowski<sup>1</sup>  
9

10 <sup>1</sup>Institute of Medical Sociology, University Medical Center Hamburg-Eppendorf, Martinistr. 52, 20246  
11 Hamburg  
12  
13  
14  
15  
16

17 Word count (main text): 4,131; tables: 3; figures: 2  
18  
19  
20  
21

22 \*Corresponding author:  
23

24 o.knesebeck@uke.de  
25  
26  
27  
28  
29  
30  
31  
32  
33  
34  
35  
36  
37  
38  
39  
40  
41  
42  
43  
44  
45  
46  
47  
48  
49  
50  
51  
52  
53  
54  
55  
56  
57  
58  
59  
60

For peer review only

## Abstract

Introduction: Some studies indicate that persistent somatic symptoms (PSS) are more prevalent among individuals with a low socioeconomic status (SES) and a migration background. However, factors explaining social inequalities in PSS are largely unknown. It is expected that aggravating factors of PSS like illness perception, illness beliefs (health literacy, stigma), illness behaviour, and health anxiety play an important role for this explanation. The SOMA.SOC study will examine social inequalities (according to SES and migration) in factors contributing to symptom persistence in Irritable Bowel Syndrome (IBS) and fatigue.

Methods and analysis: The project will collect both quantitative and qualitative data. Quantitative data will be gathered via a representative telephone survey in Germany (N=2,400). With a vignette design depicting patients varying in sex, condition (IBS/fatigue), occupational status (low/high), and migration (yes/no), we will assess public knowledge and beliefs (e.g. health literacy), attitudes (stigma), and personal experiences with the condition (e.g. somatic symptom burden) in the survey. Complementary, longitudinal qualitative interviews will be conducted with patients (n=32 at three time points, resulting in N=96 interviews) who will also vary according to sex, condition, occupational status and migration. Patients will be recruited from primary care practices in Hamburg. The interviews will cover origin and development of the condition, coping and help-seeking as well as social interactions and perception of the disease by others (e.g. perceived stigma). SOMA.SOC is part of the interdisciplinary research unit "Persistent SOMATIC Symptoms ACROSS Diseases (SOMACROSS)".

Ethics and dissemination: The study protocol was approved by the Ethics Committee of the Hamburg Medical Association on 25 January 2021 (reference number: 2020-10194- BO-ff). Informed consent will be obtained from all participants. The main findings will be submitted for publication in peer-reviewed journals within 12 months of study completion.

Key words: social inequalities, socioeconomic status, migration, somatic symptoms, symptom persistence, mixed methods, SOMACROSS

### Strengths and limitations of this study

- Social inequalities according to socioeconomic status and migration in a range of aggravating factors (illness perception, symptom beliefs, illness/treatment experiences, illness behaviour, and health anxiety) in Irritable Bowel Syndrome (IBS) and fatigue will be explored.
- By combining quantitative and qualitative data, we expect a better and more comprehensive understanding of inequalities in aggravating factors of persistent somatic symptoms (PSS).
- With the longitudinal design of the qualitative study part, we expect to gain insight into the course of symptoms and changes of experiences over time.
- Due to the observational design, causal conclusions cannot be drawn from the study.
- As the study is focussed on IBS and fatigue, results cannot be generalized to other PSS.

For peer review only

## Introduction

### Background

#### *Health inequalities according to socioeconomic status and migration*

National and international studies in social epidemiology have consistently shown that socioeconomic status (SES, i.e. education, income, and / or occupational position) as well as migration and ethnicity are important social determinants of health.<sup>[1,2]</sup> Accordingly, people with a low SES generally experience worse health and wellbeing as well as higher morbidity (including higher risk of chronic disease course) and mortality rates than those with a high SES. Material (e.g. material deprivation, unfavourable working, housing, and neighbourhood conditions), psychosocial (e.g. social isolation, psychosocial stress, coping resources) and behavioural factors (e.g. smoking, exercise, alcohol consumption, nutrition) contribute to the explanation of such health inequalities. Recent studies indicate that differences in knowledge and beliefs about health and illness (“health literacy”) are also important for the explanation of health inequalities.<sup>[3,4]</sup> However, results on the explanatory contribution of these factors are inconsistent as there is variation according to the disease under study. For example, socioeconomic inequalities of coronary heart disease can largely be explained by differences in classic cardiovascular risk factors (i.e. high blood pressure, high cholesterol, diabetes mellitus, and cigarette smoking)<sup>[5]</sup>, while poorer coping styles, ongoing life events, stress exposure, and weaker social support are important factors to explain the higher prevalences of mental disorders in lower SES groups.<sup>[6,7]</sup>

Although migrants are often, at least initially, relatively healthy compared with the non-migrant population in the host country, available data suggest that they tend to be more vulnerable to certain communicable diseases, occupational health hazards, injuries, poor mental health, and maternal and child health problems.<sup>[2,8]</sup> Studies furthermore show that there are large differences between migrants in terms of their socioeconomic situation but these differences and their health-related consequences are far from being adequately understood. As migration status and SES reflect different aspects of social inequalities, that are not independent, it is reasonable to explore both aspects and their relation to health simultaneously.<sup>[9]</sup>

#### *Social inequalities in somatic symptoms*

Regarding persistent somatic symptoms (PSS), there are a few studies investigating inequalities according to SES and migration. Using German population survey data, Hinz et al.<sup>[10]</sup> found that a low SES is associated with a higher risk for somatic symptoms measured with the Patient Health Questionnaire (PHQ-15).<sup>[11]</sup> This result was confirmed by an analysis of the Gutenberg Health Study conducted in the Rhine-Main-Region.<sup>[12]</sup> Based on the German national Cohort study, Morawa et al.<sup>[13]</sup> showed that persons of Turkish origin report more symptoms according to the PHQ-15 compared to Germans. Moreover, psychiatric patients with a migration background had a significantly higher current symptom load, especially by somatic symptoms, compared to those without migration background.<sup>[14]</sup>

Thus, overall, results suggest that somatic symptoms are more prevalent among individuals with a low SES and a migration background in Germany. Respective empirical studies mostly use sum scales comprising a number of symptoms but magnitude and mechanisms of inequalities may differ

1  
2  
3 depending on symptom under study. Considering specific PSS with high prevalence like fatigue (about  
4 30% in Germany<sup>[15,16]</sup>) or the Irritable Bowel Syndrome (IBS, about 10-20% in Germany<sup>[17]</sup>), research on  
5 inequalities is scarce, particularly in Germany. Jason et al.<sup>[18]</sup> found highest levels of fatigue among  
6 minority groups and persons with lower levels of education and occupational status in the US. A  
7 German population study also revealed increased rates of fatigue among low SES groups.<sup>[16]</sup> Another  
8 study indicates that there are interactions between SES and ethnicity in the association with fatigue.<sup>[19]</sup>  
9 In terms of IBS, there are studies showing higher prevalences in lower SES groups<sup>[20]</sup> but others find a  
10 reverse association or no socioeconomic inequalities.<sup>[21-23]</sup> There is a paucity of data on differences  
11 according to migration status in the epidemiology of IBS.  
12  
13  
14

### 15 16 *Social inequalities in aggravating factors of PSS*

17  
18 Aetiological models suggest that psychosocial, behavioural, and biomedical factors, as well as their  
19 interaction, contribute to the persistence and aggravation of somatic symptom burden.<sup>[24]</sup> Among  
20 these aggravating factors are illness beliefs, illness perception, treatment experiences, illness  
21 behaviour, and health anxiety. It can be expected that these factors also play an important role for  
22 explaining inequalities in PSS. However, empirical studies analysing social inequalities in aggravating  
23 factors are scarce and thus, there is not much known about the mechanisms that potentially can  
24 explain inequalities in PSS.  
25  
26

27  
28 Studies on illness beliefs examine to what extent an illness is recognized as such and what beliefs about  
29 the causes, the course and the treatment of this illness are prevalent among the public. In recent years,  
30 these studies have been discussed with reference to the concept of health literacy. Health literacy  
31 entails “the public’s knowledge, motivation, and competence to access, understand, appraise, and  
32 apply health information in order to make judgments and take decisions in everyday life concerning  
33 healthcare”.<sup>[25]</sup> Deficits in health literacy mean that people do not know what they can do for  
34 prevention, delay or avoid seeking treatment, view recommended treatments with suspicion, or are  
35 unsure how to assist those afflicted.<sup>[26]</sup> Limited health literacy has been found among people with a  
36 low SES and migrant background.<sup>[4,27,28]</sup> For example, a study analysing differences between German  
37 and Turkish patients suffering from somatoform disorders showed that Turkish patients believed  
38 significantly stronger in supernatural causes of their disease and that these beliefs reduced the  
39 motivation to take up psychotherapy.<sup>[29]</sup> A lack of health literacy has been found to be associated with  
40 negative attitudes towards persons with mental illness,<sup>[28]</sup> which can be conceptualized as public  
41 stigma. This entails reactions of the general public towards a group based on stereotypes about this  
42 group. In this regard, results suggest that respondents with higher SES desire less social distance from  
43 the mentally ill and express more liberal views.<sup>[30]</sup> Research also suggests that public stigma is  
44 perceived and often internalized by the persons afflicted. Perceived and internalized stigma have been  
45 found to predict worse health outcomes among IBS patients.<sup>[31]</sup> With regards to fatigue, studies report  
46 higher levels of perceived stigma when compared to IBS<sup>[32]</sup> and participants report feelings of  
47 estrangement and the belief that others attribute fatigue solely to psychological causes.<sup>[33]</sup>  
48  
49  
50  
51  
52  
53  
54

55  
56 Only few studies examined inequalities in symptom or illness perception and health anxiety. In terms  
57 of the former, perceived symptom burden seems to be positively associated with education,<sup>[34]</sup> while  
58 results on differences according to ethnicity and migration are inconsistent.<sup>[34,35]</sup> As for health anxiety,  
59 a recent meta-analysis showed a lower risk for health anxiety in people with higher socioeconomic  
60 status.<sup>[36]</sup> Another meta-analysis indicated a higher risk of health anxiety in migrants and ethnic

1  
2  
3 minorities compared to the majority population in North America.<sup>[37]</sup> Regarding illness behaviour,  
4 reviews from Germany overall indicate a lower utilization of health care among migrants, although the  
5 results vary in terms of health care sector, indicator of health care utilization and migrant population  
6 under study.<sup>[38]</sup> Low SES groups show lower utilization regarding medical specialist consultations and  
7 prevention services.<sup>[39]</sup> However, hardly any of the studies included in these reviews specifically  
8 address PSS. Thus, overall, there are some studies indicating social inequalities in aggravating factors.  
9 However, research is fragmented and mostly not related to PSS.  
10  
11  
12  
13  
14

## 15 **Objectives and hypotheses**

16  
17 Against this background, the present study “Social inequalities in aggravating factors of somatic  
18 symptom persistence (SOMA.SOC)” was developed. The objective of the study is to examine social  
19 inequalities (according to SES and migration) in factors contributing to symptom persistence in IBS and  
20 fatigue. We chose these two specific conditions as they appear relatively frequently in the German  
21 population. In terms of IBS, we especially refer to the cardinal symptoms of recurrent abdominal pain  
22 and altered bowel movements (as specified in the International Classification of Diseases 10<sup>th</sup> Edition,  
23 ICD-10<sup>[40]</sup>). Regarding fatigue, different symptoms like emotional and cognitive limitations (e.g. lack of  
24 motivation and reduced performance) as well as physical complaints (e.g. muscular weakness) are to  
25 be considered (as mentioned in the national guideline<sup>[15]</sup> and covered in the ICD-10<sup>[40]</sup>). The following  
26 aggravating factors will be explored: illness perception, knowledge and beliefs about the symptoms,  
27 illness and treatment experiences, illness behaviour, and health anxiety.  
28  
29  
30  
31

32 More specifically the following hypotheses will be explored: 1) SES and migration are associated with  
33 factors contributing to the symptom persistence (aggravating factors) of IBS and fatigue. 2) There are  
34 differences in public perceptions of and public beliefs about IBS and fatigue according to the SES and  
35 migration status of the person expressing the symptoms.  
36  
37

38 The SOMA.SOC study is part (project 6) of the interdisciplinary research unit “Persistent SOMATIC  
39 symptoms ACROSS diseases — from risk factors to modification (SOMACROSS)”. SOMACROSS aims to  
40 identify disease-overarching and disease-specific biopsychosocial risk factors and mechanisms for the  
41 persistence of somatic symptoms.<sup>[41]</sup> SOMACROSS proposes a biopsychosocial ‘PSS working model’ as  
42 a starting point for the investigation of risk factors and aetiological mechanisms, based on the model  
43 by Henningsen et al.<sup>[24]</sup> The integration of the objectives of the SOMA.SOC project into the working  
44 model of SOMACROSS is shown in Figure 1.  
45  
46  
47

48 (Figure 1 about here)  
49  
50

## 51 **Methods and analysis**

### 52 **Study design and participants**

53  
54 In order to gain insight in social inequalities in aggravating factors of IBS and fatigue, the project will  
55 make use of a mixed methods design by collecting both quantitative and qualitative observational  
56 data. For a better understanding of the methods, in the following, these two study parts (population  
57 survey and qualitative interviews with patients) will be presented separately. The conditions under  
58 study will be conceptualized differently in the two study parts: While we will use vignettes describing  
59  
60

1  
2  
3 a person with typical symptoms of IBS or fatigue in the population survey, patients diagnosed with one  
4 of the conditions will be recruited for the qualitative interviews. Data collection started in April 2022  
5 and will be finalized in summer 2024.  
6

### 7 *Population survey*

8  
9 To explore public knowledge, beliefs, attitudes, and experiences regarding PSS in the case of IBS and  
10 fatigue, a population survey will be conducted throughout Germany via computer-assisted telephone  
11 interviewing (CATI). This cross-sectional survey is going to be representative of the resident population  
12 in Germany aged 18 years and older, and utilizes a dual-frame approach, i.e. 30% of the gross sample  
13 consists of mobile numbers, while 70% will be selected from landline numbers. Thus, there is greater  
14 chance of including mobile-only users as well as target groups otherwise hard to reach. Landline  
15 numbers will be drawn from all registered private numbers at random. Additional computer-generated  
16 numbers will also allow for ex-directory household. For interviews in households with more than one  
17 potential target person, a random selection of the target person is realized using the Kish-Selection-  
18 Grid.<sup>[42]</sup> Regarding mobile telephone connections, the interview will be conducted with the person  
19 answering the phone. To gain a representative sample of the adult population living in Germany, data  
20 will be weighted by using an approach that includes a correction for household sizes, selection  
21 probabilities and distributions of specific socio-demographic characteristics.<sup>[43]</sup>  
22  
23  
24  
25

26 (Table 1 about here)

27 In the beginning of the interview, a case story (vignette) will be presented to the respondents. In the  
28 vignette, a person with signs and symptoms indicative of either IBS or fatigue will be described. The  
29 vignettes will be varied according to sex (male / female), occupational status (high (lawyer) / low  
30 (cleaner)), and migration status (yes / no), resulting in 16 different case stories (please see Table 1 for  
31 an overview of the varied factors and Table 2 for resulting vignettes). The vignettes will be designed in  
32 cooperation with clinical experts. By combining a vignette design with a survey, social inequalities may  
33 be examined from two perspectives: first, as social characteristics of the respondents themselves  
34 (please see above, hypothesis 1) and second, of the person described in the vignette (hypothesis 2). In  
35 terms of the first hypothesis, associations between social characteristics of the respondents and  
36 aggravating factors (e.g. illness and treatment experiences, illness behaviour, health anxiety) will be  
37 analysed, while for the second hypothesis, differences in perceptions, attitudes, and beliefs according  
38 to migration and occupational status of the person in the vignette will be examined.  
39  
40  
41  
42

43 (Table 2 about here)

44 A total of N = 2,400 participants will be included in the national telephone survey. The 16 vignettes will  
45 be randomly assigned to the respondents (n = 150 per vignette). A sample size calculation showed that  
46 this number is sufficient to identify small sized differences with a statistical power of 80% and a Type-  
47 I error of 0.05 when comparing two vignettes (hypothesis 2) with regards to categorical outcomes  
48 using  $\chi^2$ -tests. As for continuous outcomes, a sample size of n = 150 per vignette allows for the  
49 detection of small to medium effect sizes based on t-tests, linear regression models, or analyses of  
50 variance (statistical power 80%, Type-I error = 0.05). Moreover, based on previous studies with a  
51 similar design,<sup>[44-46]</sup> this number of respondents was found to be adequate to detect significant  
52 differences in public beliefs between vignettes. Similar surveys with a vignette design resulted in  
53 response rates between 48% and 54%.<sup>[44-46]</sup>  
54  
55  
56

### 57 *Qualitative patient interviews*

58 To complement the population perspective and to analyse social inequalities in factors and  
59 mechanisms of symptom persistence among patients with IBS and fatigue, qualitative interviews will  
60



1  
2  
3 be conducted using a longitudinal design. Longitudinal qualitative research (LQR) is distinct from other  
4 qualitative approaches in the way that it incorporates time into the research process. It opens the  
5 possibility to make change (or stability) a key focus in analysis.<sup>[47]</sup> LQR aims at answering questions  
6 regarding lived experiences, e.g. during the course of diseases, and how and why these experiences  
7 change over time. Against the background of the ongoing process of persistence of somatic symptoms,  
8 LQR will be helpful to capture individual courses, narratives and trajectories.  
9

10  
11 Patients will be recruited from primary care practices in the Hamburg region and will be selected  
12 according to condition (IBS / fatigue), sex (male / female), occupational status (high / low), and  
13 migration status (yes / no). With respect to the occupational status of patients, the International Socio-  
14 Economic Index of Occupational Status (ISEI) according to Ganzeboom et al.<sup>[48]</sup> will be used as a  
15 criterion for assigning scores. Scores will be dichotomized to obtain groups of high and low  
16 occupational position. Regarding the patients' migration history, we will be adapting the definition of  
17 the German Federal Statistical Office. This states that "A person has a migration background if he or  
18 she or at least one parent was not born with German citizenship".<sup>[49]</sup> For recruitment of the patients,  
19 the authors will cooperate with the Department of General Practice and Primary Care at the University  
20 Medical Center Hamburg-Eppendorf, which established a physicians' research network. Physicians are  
21 listed in a database that includes contact details of all primary care physicians residing in Hamburg and  
22 its suburbs as well as in adjacent regions (overall about 3,000 primary care physicians). The database  
23 holds information on contact data, structure of the practice (single vs. group practice), physician staff  
24 and involvement in recent research projects. 50 practices will be randomly selected and contacted (for  
25 details please see sample size estimation below and Figure 2).  
26  
27  
28  
29

30 (Figure 2 about here)

31  
32 Semi-structured interviews with 32 patients will be conducted at three measurement points (at the  
33 time of inclusion (t0), after 6 months (t1), and after 12 months (t2)), resulting in 96 interviews. Patients  
34 will be selected based on a purposeful sampling procedure according to the four strata mentioned  
35 above (condition, sex, occupational status, and migration). This procedure was chosen as it is expected  
36 to be useful to analyse social inequalities in factors and mechanisms of symptom persistence. Patients  
37 will be recruited via primary care practices in the Hamburg region. Based on experiences in previous  
38 projects, we expect a participation rate of at least 50% of the randomly selected practices.<sup>[50]</sup> This will  
39 lead to around 25 practices taking up patient recruitment. We also estimate the participation rate of  
40 the addressed patients at 50%, meaning that the practices will have to contact 96 patients (around  
41 four patients per practice in six months), leading to 48 patients with the required combination of  
42 characteristics who supply informed consent to participate. This will allow for a drop-out rate of  
43 approximately 30% among participants during the course of the study, resulting in n = 32 patients who  
44 will be included in all three measurement points (please see Figure 2). For each of the 16 combinations  
45 (IBS / fatigue), sex (male / female), migration (yes / no), and occupational status (high / low), two semi-  
46 structured interviews will be conducted. This sampling procedure will result in an equal number of  
47 patients (n = 16) in terms of condition, sex, occupational status, and migration status interviewed at  
48 three measurement points.  
49  
50  
51

52  
53 There will be a two-staged recruitment process. The selected practices will be contacted via telephone  
54 by a member of the project group, the project will be briefly explained and the interest in participating  
55 in the study will be assessed. If interested in participation, the practice will receive a detailed study  
56 information, a process description, and a declaration of consent to participate. Moreover, the  
57 participating practices will be provided with all necessary study materials to be handed out to patients  
58 (e.g. study information, privacy statement, short questionnaire to collect necessary patient data (e.g.  
59 name, condition, sex, age, occupation, contact information)).  
60



Doctors are asked to inform patients who meet the diagnostic criteria (K58.1 (IBS-D), K58.2 (IBS-C), K58.3 (IBS-M), K58.8, R53, F48.0, or G93.3 according to ICD-10<sup>[40]</sup>) about the study when they present in the practice. Those patients who are interested in participation are requested to return a short questionnaire with all relevant information about eligibility including contact details to the project group (either via mail, e-mail or fax). Returned questionnaires will be sorted according to strata (condition, sex, migration status, occupational position). Thereafter, telephone calls will be conducted to provide further information if needed and to arrange an interview appointment. Informed consent will be signed by all participating patients. Participants will be free to conduct the interviews in person or by telephone. To acknowledge their participation and compensate for expenses, each patient will receive 15€ for each completed interview, the physicians will receive 50€ per patient included in the study.

## Assessment and study outcomes

### *Population survey*

The standardized questionnaire used in the telephone survey will cover the following topics (1) questions referring to knowledge and beliefs about IBS or fatigue, (2) attitudes towards persons affected from IBS or fatigue (stigma), (3) personal experiences with these symptoms, and (4) sociodemographic characteristics of respondents (please also see Table 3<sup>[51-54]</sup>). As for social inequalities, highest educational attainment, occupational position, monthly equivalence household income, and migration status (no migration background, 1<sup>st</sup> and 2<sup>nd</sup> generation migrants) will be assessed.<sup>[55]</sup> In Germany, about 25% of the general population have a migration background. Accordingly, in our sample (N=2,400), we expect about 600 respondents to have a migration background. In terms of knowledge and beliefs about IBS or fatigue, health literacy, illness perceptions, and illness beliefs will be measured. Regarding personal experiences with the symptoms, questions about illness behaviour, illness and treatment experiences, somatic symptom burden, and health anxiety will be included.

(Table 3 about here)

### *Qualitative patient interviews*

Semi-structured interviews will be conducted personally or by telephone (according to patient preference). To this end, a blend of closed and open-ended questions will be used that can be accompanied by follow-up questions to further specify mentioned topics. The precise formulation and order of the questions can be varied. This will allow to cover the main issues with all participants while also offering flexibility in discussing issues pertinent to individuals. The interviews will have a length of about 30 minutes and will be audio-recorded upon permission of the patient. A total of three sections are planned for the interview guide:

(1) Origin, causes and development of the disease: Here, aspects of symptom / illness perception as well course and severity of symptoms and aspects of health anxiety will be covered.

(2) Coping with the illness and help-seeking: In this segment, illness behaviour and experiences, health literacy as well as treatment experiences and treatment expectations will be focused.

(3) Social interaction and perception by others: This complex will cover disclosure of illness and (perceived) stigma associated with the disorder.

## Data analyses

### *Population survey*

Associations between social characteristics of the respondents and aggravating factors will be analysed by calculating regression models (hypothesis 1). Furthermore, structural equation model approaches will be utilized to explore to what extent social inequalities in PSS are mediated by the aggravating factors under study and to what extent variance is mediated by other (unconsidered) factors. Differences in public perceptions, attitudes, and beliefs according to migration and occupational status of the person in the vignette (hypothesis 2) will be examined using analyses of variance. The power calculation showed that the sample size is sufficient to detect significant main effects (e.g. of migration status of the person in the vignette) as well as two-way interactions (e.g. between migration and occupational status). In terms of the latter, interaction tests will be performed. Regarding categorical outcomes (e.g. recognition of condition presented in the vignette (yes or no)),  $\chi^2$ -tests will be applied. Missing data will be imputed if more than 5% of the data are missing. The number of imputations will be chosen dependent on the proportion of missing data.

### *Qualitative patient interviews*

Subject to the consent of the participants, the interviews will be audio-recorded. Uniform transcription rules will be established before the start of the analysis, and compliance with these rules will be checked several times during the course of the process. For the analysis of the transcribed interviews, qualitative content analysis (QCA) will be used. A core aspect of QCA is to make the interpretation of text describable and verifiable by using content analysis rules previously formulated on the basis of a work plan. The technique of inductive category formation is particularly suitable for this study design. Inductive categories are developed from the interview material according to a given definition criterion, in order to reach the central aspects of the text. Step by step, categories will be formulated, which are revised within feedback loops eventually reduced to main categories and checked in respect to their reliability.<sup>[56]</sup>

The data from both study parts are seen as two complementing perspectives on social aspects that contribute to the symptom persistence of IBS and fatigue. In using these different approaches, we expect a better and more comprehensive understanding of inequalities in aggravating factors of PSS and how they are associated with patients' and the public's characteristics. Integration of data of the two study parts will be feasible as there are overlaps in design (variation of social characteristics) and content of the survey/interview (please see assessment and study outcomes). To this end, results of the quantitative part will be triangulated with corresponding statements from the qualitative interviews.<sup>[57]</sup>

## **Patient and public involvement**

None.

## **Ethics and dissemination**

The study is based on data of personal or telephone interviews. Thus, ethical and legal considerations are focused on data protection. We will strictly adhere to data protection regulations. Informed consent will be obtained from all participants. Respondents will be informed that participation in the study is voluntary and that withdrawal is possible at any time. There are no specific risks for the participants in the study. The study protocol was approved by the Ethics Committee of the Hamburg Medical Association on 25 January 2021 (reference number: 2020-10194- BO-ff).

1  
2  
3 In accordance with the ethics committee approval and the German Research Foundation (DFG)  
4 guidelines for the handling of research data, deidentified quantitative individual data will be made  
5 publicly available. Data sharing will follow the FAIR Data Principles (Findable, Accessible, Interoperable  
6 and Reusable). The main findings will be submitted for publication in peer-reviewed journals within 12  
7 months of study completion.  
8  
9  
10  
11  
12  
13  
14  
15  
16  
17  
18  
19  
20  
21  
22  
23  
24  
25  
26  
27  
28  
29  
30  
31  
32  
33  
34  
35  
36  
37  
38  
39  
40  
41  
42  
43  
44  
45  
46  
47  
48  
49  
50  
51  
52  
53  
54  
55  
56  
57  
58  
59  
60

For peer review only

1  
2  
3 **Acknowledgements:** We would like to acknowledge the continued contributions of all colleagues of  
4 the Research Unit 5211 'SOMACROSS' (FOR 5211) to the design of this study.  
5

6 **Contributors:** OvdK and AM developed the study. OvdK is the principal investigator of the study. RB  
7 is research associate in the study. All authors contributed to the refinement of the study protocol,  
8 read and approved the final version.  
9

10 **Funding:** The SOMA.SOC study is supported by the German Research Foundation (Deutsche  
11 Forschungsgemeinschaft, DFG) (project number: 445297796, please see  
12 <https://gepris.dfg.de/gepris/projekt/460374208?language=en>). It is part of the collaborative research  
13 unit 5211 (RU 5211) "Persistent SOMAtic symptoms ACROSS diseases: from risk factors to  
14 modification (SOMACROSS)" also funded by the DFG (spokesperson: Professor Bernd Löwe, MD).  
15  
16

17 **Competing interests:** None declared.  
18

19 **Patient consent for publication:** Not applicable.  
20

21 **Provenance and peer review:** The manuscript underwent peer-review. Moreover, there was peer  
22 review for ethical and funding approval prior to submission.  
23  
24  
25  
26  
27  
28  
29  
30  
31  
32  
33  
34  
35  
36  
37  
38  
39  
40  
41  
42  
43  
44  
45  
46  
47  
48  
49  
50  
51  
52  
53  
54  
55  
56  
57  
58  
59  
60

## References

1. Marmot M. Social determinants of health inequalities. *Lancet*. 2005;365:1099–104.
2. Rechel B, Mladovsky P, Ingleby D, et al. Migration and health in an increasingly diverse Europe. *Lancet*. 2013;381:1235–45.
3. World Health Organization. Health Literacy. The Solid Facts [Internet]. 2013. Available from: <https://apps.who.int/iris/bitstream/handle/10665/128703/e96854.pdf>
4. von dem Knesebeck O, Mnich E, Daubmann A, et al. Socioeconomic status and beliefs about depression, schizophrenia and eating disorders. *Soc Psychiatry Psychiatr Epidemiol*. 2013;48(5):775–82.
5. Kivimäki M, Shipley MJ, Ferrie JE, et al. Best-practice interventions to reduce socioeconomic inequalities of coronary heart disease mortality in UK: a prospective occupational cohort study. *Lancet*. 2008;372(9650):1648–54.
6. Lorant V, Deliège D, Eaton W, et al. Socioeconomic inequalities in depression: A meta-analysis. *Am J Epidemiol*. 2003;157(2):98–112.
7. Muntaner C, Eaton WW, Miech R, et al. Socioeconomic position and major mental disorders. *Epidemiol Rev*. 2004;26:53–62.
8. Razum O, Karrasch L, Spallek J. [Migration. A neglected dimension]. *Bundesgesundheitsblatt - Gesundheitsforsch - Gesundheitsschutz*. 2016;59:259–65.
9. Malmusi D, Borrell C, Benach J. Migration-related health inequalities: Showing the complex interactions between gender, social class and place of origin. *Soc Sci Med*. 2010;71(9):1610–9.
10. Hinz A, Ernst J, Glaesmer H, et al. Frequency of somatic symptoms in the general population: Normative values for the Patient Health Questionnaire-15 (PHQ-15). *J Psychosom Res*. 2017;96(August 2011):27–31.
11. Kroenke K, Spitzer RL, Williams JBW, et al. The Patient Health Questionnaire Somatic, Anxiety, and Depressive Symptom Scales: A systematic review. *Gen Hosp Psychiatry*. 2010;32(4):345–59.
12. Beutel ME, Wiltink J, Kerafirodi JG, et al. Somatic symptom load in men and women from middle to high age in the Gutenberg Health Study - association with psychosocial and somatic factors. *Sci Rep*. 2019;9(4610):1–9.
13. Morawa E, Dragano N, Jöckel K-H, et al. Somatization among persons with Turkish origin: Results of the pretest of the German National Cohort Study. *J Psychosom Res*. 2017;96:1–9.
14. Brandl EJ, Dietrich N, Mell N, et al. Clinical and sociodemographic differences between patients with and without migration background in a psychiatric outpatient service. *Psychiatr Prax*. 2018;45:367–74.
15. Baum E, Donner-Banzhoff N, Maisel P. [Fatigue] [S3-Guideline]. 2017.
16. Kocalevent RD, Hinz A, Brähler E, et al. Determinants of fatigue and stress. *BMC Res Notes*. 2011;4(238).
17. [Federal Ministry of Health]. [Irritable Bowel Syndrome] [Internet]. 2020. Available from: <https://gesund.bund.de/reizdarmsyndrom>
18. Jason LA, Richman JA, Rademaker AW, et al. A community-based study of Chronic Fatigue Syndrome. *Arch Intern Med*. 1999;159:2129–37.
19. Bardwell WA, Burke SC, Thomas KS, et al. Fatigue varies by social class in African Americans but not Caucasian Americans. *Int J Behav Med*. 2006;13(3):252–8.
20. Spiegel BMR. The burden of IBS: Looking at metrics. *Curr Gastroenterol Rep*. 2009;11:265–9.
21. Canavan C. The epidemiology of irritable bowel syndrome. *Clin Epidemiol*. 2014;6:71–80.
22. Lovell RM, Ford AC. Global prevalence of and risk factors for irritable bowel syndrome: A meta-analysis. *Clin Gastroenterol Hepatol*. 2012;10:712–21.

23. Howell S, Talley N, Quine S, et al. The irritable bowel syndrome has origins in the childhood socioeconomic environment. *Am J Gastroenterol*. 2004;99(8):1572–8.
24. Henningsen P, Zipfel S, Sattel H, et al. Management of functional somatic syndromes and bodily distress. *Psychother Psychosom*. 2018;87:12–31.
25. Sørensen K, Van Den Broucke S, Fullam J, et al. Health literacy and public health: A systematic review and integration of definitions and models. *BMC Public Health*. 2012;12(1).
26. Jorm AF. Mental health literacy: empowering the community to take action for better mental health. *Am Psychol*. 2012;67(3):231–43.
27. Bostock S, Steptoe A. Association between low functional health literacy and mortality in older adults: longitudinal cohort study. *BMJ Open*. 2012;344(e1602):1–10.
28. Holman D. Exploring the relationship between social class, mental illness stigma and mental health literacy using British national survey data. *Health (Irvine Calif)*. 2015;19(4):413–29.
29. Reich H, Bockel L, Mewes R. Motivation for psychotherapy and illness beliefs in Turkish immigrant inpatients in Germany: Results of a cultural comparison study. *J Racial Ethn Heal Disparities*. 2015;2(1):112–23.
30. Angermeyer MC, Dietrich S. Public beliefs about and attitudes towards people with mental illness: A review of population studies. *Acta Psychiatr Scand*. 2006;113(3):163–79.
31. Taft TH, Riehl ME, Dowjotas KL, et al. Moving beyond perceptions: internalized stigma in the irritable bowel syndrome. *Neurogastroenterol Motil*. 2014;26:1026–35.
32. Looper KJ, Kirmayer LJ. Perceived stigma in functional somatic syndromes and comparable medical conditions. *J Psychosom Res*. 2004;57:373–8.
33. Green J, Romei J, Natelson BH. Stigma and Chronic Fatigue Syndrome. *J Chronic Fatigue Syndr*. 1999;5(2):63–75.
34. Luo H, Lindell DF, Jurgens CY, et al. Symptom perception and influencing factors in chinese patients with heart failure: A preliminary exploration. *Int J Environ Res Public Health*. 2020;17(2692).
35. Wilkins SS, Bourke P, Salam A, et al. Functional stroke mimics: Incidence and characteristics at a primary stroke center in the Middle East. *Psychosom Med*. 2018;80:416–21.
36. Barbek R, Makowski A, von dem Knesebeck O. Social inequalities in health anxiety: A systematic review and meta-analysis. *J Psychosom Res*. 2022;153: 960256.
37. Barbek R, Henning S, Ludwig J, et al. Ethnic and migration-related inequalities in health anxiety: A systematic review and meta-analysis. *Front Psychol*. 2022;13:960256.
38. Klein J, von dem Knesebeck O. Inequalities in health care utilization among migrants and non-migrants in Germany: a systematic review. *Int J Equity Health*. 2018;17(160):1–10.
39. Klein J, von dem Knesebeck O. [Social disparities in outpatient and inpatient care. An overview of current findings in Germany]. *Bundesgesundheitsblatt - Gesundheitsforsch - Gesundheitsschutz*. 2016;2:238–44.
40. Deutsches Institut für Medizinische Dokumentation und Information. ICD-10-WHO Version 2019 [Internet]. Available from: <https://www.dimdi.de/static/de/klassifikationen/icd/icd-10-who/kode-suche/htmlamt12019/>
41. Löwe B, Andresen V, Van den Bergh O, et al. Persistent SOMATIC symptoms ACROSS diseases - from risk factors to modification: scientific framework and overarching protocol of the interdisciplinary SOMACROSS research unit (RU 5211). *BMJ Open*. 2022;12(1):e057596.
42. Kish L. A procedure for objective respondent selection within the household. *J Am Stat Assoc*. 1949;44(247):380–7.
43. Kolenikov S. Calibrating survey data using iterative proportional fitting (raking). *Stata J* 2014;14:22-59.

- 1
- 2
- 3 44. Makowski AC, Mnich EE, Ludwig J, et al. Changes in beliefs and attitudes toward people with
- 4 depression and schizophrenia - results of a public campaign in Germany. *Psychiatry Res.*
- 5 2016;237.
- 6
- 7 45. von dem Knesebeck O, Kofahl C, Makowski AC. Differences in depression stigma towards
- 8 ethnic and socio-economic groups in Germany - Exploring the hypothesis of double stigma. *J*
- 9 *Affect Disord.* 2017;208:82–6.
- 10
- 11 46. von dem Knesebeck O, Löwe B, Lehmann M, et al. Public beliefs about somatic symptom
- 12 disorders. *Front Psychiatry.* 2018;9:1–7.
- 13
- 14 47. Calman L, Brunton L, Molassiotis A. Developing longitudinal qualitative designs: Lessons
- 15 learned and recommendations for health services research. *BMC Med Res Methodol.*
- 16 2013;13:14.
- 17
- 18 48. Ganzeboom HBG, De Graaf PM, Treiman DJ. A standard international socio-economic index of
- 19 occupational status. *Soc Sci Res.* 1992;21:1–56.
- 20
- 21 49. destatis. Population with migration background - Results of the microcensus 2019 - Series 1
- 22 Section 2.2. 2020.
- 23
- 24 50. Koens S, Marx G, Gras C, et al. Physicians' information seeking behavior in patients presenting
- 25 with heart failure symptoms – Does gender of physician and patient matter ? *Patient Education*
- 26 *Couns.* 2020;103:2437-2442.
- 27
- 28 51. Broadbent E, Petrie KJ, Main J, et al. The Brief Illness Perception Questionnaire. *J Psychosom*
- 29 *Res.* 2006;60:631–7.
- 30
- 31 52. Jones MP, Keefer L, Bratten J, et al. Development and initial validation of a measure of
- 32 perceived stigma in irritable bowel syndrome. *Psychol Health Med.* 2009;14(3):367–74.
- 33
- 34 53. Gierk B, Kohlmann S, Kroenke K, et al. The Somatic Symptom Scale-8 (SSS-8): A brief measure
- 35 of somatic symptom burden. *JAMA Intern Med.* 2014;174(3):399–407.
- 36
- 37 54. Fink P, Ewald H, Jensen J, et al. Screening for somatization and hypochondriasis in primary care
- 38 and neurological in-patients: A seven-item scale for hypochondriasis and somatization. *J*
- 39 *Psychosom Res.* 1999;46(3):261–73.
- 40
- 41 55. Lampert T, Kroll LE, Müters S, et al. [Measurement of socioeconomic status in the German
- 42 Health Interview and Examination Survey for Adults (DEGS1)]. *Bundesgesundheitsblatt -*
- 43 *Gesundheitsforsch - Gesundheitsschutz.* 2013;56:631–636.
- 44
- 45 56. Mayring P, Brunner E. [Qualitative Content Analysis]. In: Buber R, Holzmüller HH, editors.
- 46 [Qualitative market research: Concepts - Methods - Analyses] 2007. p. 669–80.
- 47
- 48 57. Marx G, Koens S, von dem Knesebeck O et al. Age and gender differences in diagnostic
- 49 decision-making of early heart failure: results of a mixed-methods interview-study using video
- 50 vignettes. *BMJ Open* 2022;12:e054025.
- 51
- 52
- 53
- 54
- 55
- 56
- 57
- 58
- 59
- 60

Table 1: Factors presented in the vignettes

| Factor              | Specifications                 |                           |
|---------------------|--------------------------------|---------------------------|
| Condition           | Irritable Bowel Syndrome (IBS) | Fatigue (Fa)              |
| Sex                 | Male (M)                       | Female (F)                |
| Migration history   | Migration history (Mh)         | No Migration history (nM) |
| Occupational status | High (Lawyer, L)               | Low (Cleaner, C)          |

For peer review only



Table 2: Vignettes presented in the survey

| Vignette No. | Factor combination |
|--------------|--------------------|
| 1            | IBS M Mh L         |
| 2            | IBS M nM L         |
| 3            | IBS M Mh C         |
| 4            | IBS M nM C         |
| 5            | IBS F Mh L         |
| 6            | IBS F nM L         |
| 7            | IBS F Mh C         |
| 8            | IBS F nM C         |
| 9            | Fa M Mh L          |
| 10           | Fa M nM L          |
| 11           | Fa M Mh C          |
| 12           | Fa M nM C          |
| 13           | Fa F Mh L          |
| 14           | Fa F nM L          |
| 15           | Fa F Mh C          |
| 16           | Fa F nM C          |

For abbreviations of the factor combinations please see Table 1.

Table 3: Instruments intended to use in the population survey

|            | Construct              | Indicator/Instrument                                                                                                                     |
|------------|------------------------|------------------------------------------------------------------------------------------------------------------------------------------|
| <b>(1)</b> | Health literacy        | Labelling (recognition of disease); perceived causes; treatability; effectiveness of treatment options                                   |
|            | Illness perception     | Illness Perception Questionnaire (brief version, IPQ-B) <sup>[51]</sup>                                                                  |
|            | Illness belief         | E.g. "Do you think that the person in the vignette has a real disorder?"                                                                 |
| <b>(2)</b> | Public stigma          | Emotional reactions towards those affected by IBS or fatigue<br>Stereotypes ascribed to persons with IBS or fatigue                      |
|            | Anticipated stigma     | Modified version of the IBS Stigma Scale <sup>[52]</sup>                                                                                 |
| <b>(3)</b> | Illness behaviour      | E.g. "If you have the feeling of being affected by such complaints, you should get help as soon as possible."<br>Health care utilization |
|            | Illness experience     | Own affliction; contact to someone affected                                                                                              |
|            | Treatment experience   | Treatment experience                                                                                                                     |
|            | Somatic symptom burden | Somatic Symptom Scale (SSS-8) <sup>[53]</sup>                                                                                            |
|            | Health anxiety         | Whiteley Index (WI-7) <sup>[54]</sup>                                                                                                    |
| <b>(4)</b> | Sociodemographic data  | Age, sex, educational attainment, occupational position, income, migration status, marital status                                        |

1  
2  
3  
4  
5 Figure 1: Integration of the study objectives into the working model of the Research unit “Persistent  
6 SOMAtic symptoms ACROSS diseases — from risk factors to modification (SOMACROSS)” [41]  
7  
8  
9  
10

11  
12 Figure 2: Two-stage recruitment process of patients for the qualitative interviews via primary care  
13 practices in Hamburg  
14  
15  
16  
17  
18  
19  
20  
21  
22  
23  
24  
25  
26  
27  
28  
29  
30  
31  
32  
33  
34  
35  
36  
37  
38  
39  
40  
41  
42  
43  
44  
45  
46  
47  
48  
49  
50  
51  
52  
53  
54  
55  
56  
57  
58  
59  
60

For peer review only

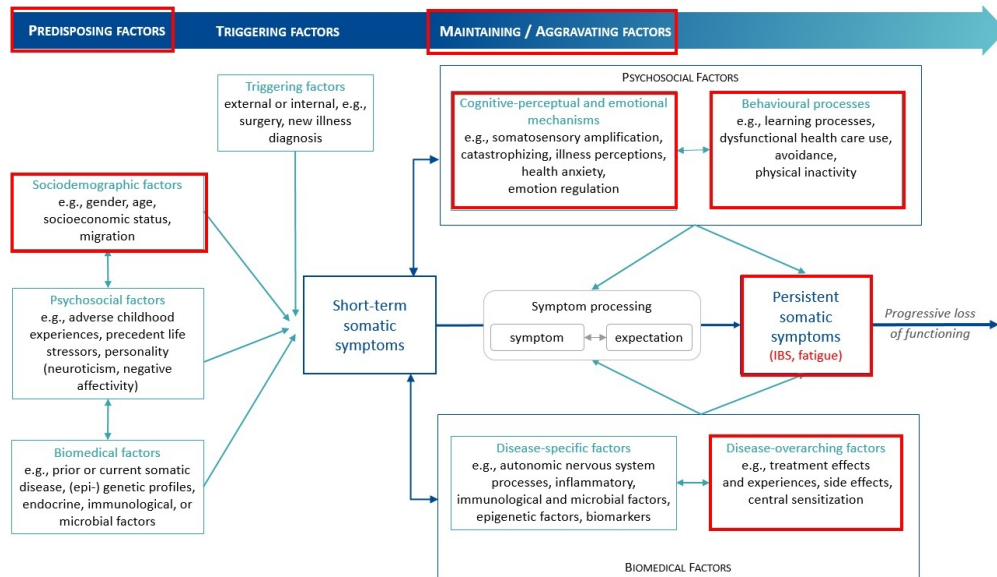

Figure 1: Integration of the study objectives into the working model of the Research unit "Persistent SOMATIC symptoms ACROSS diseases – from risk factors to modification (SOMACROSS)" 41

340x200mm (96 x 96 DPI)

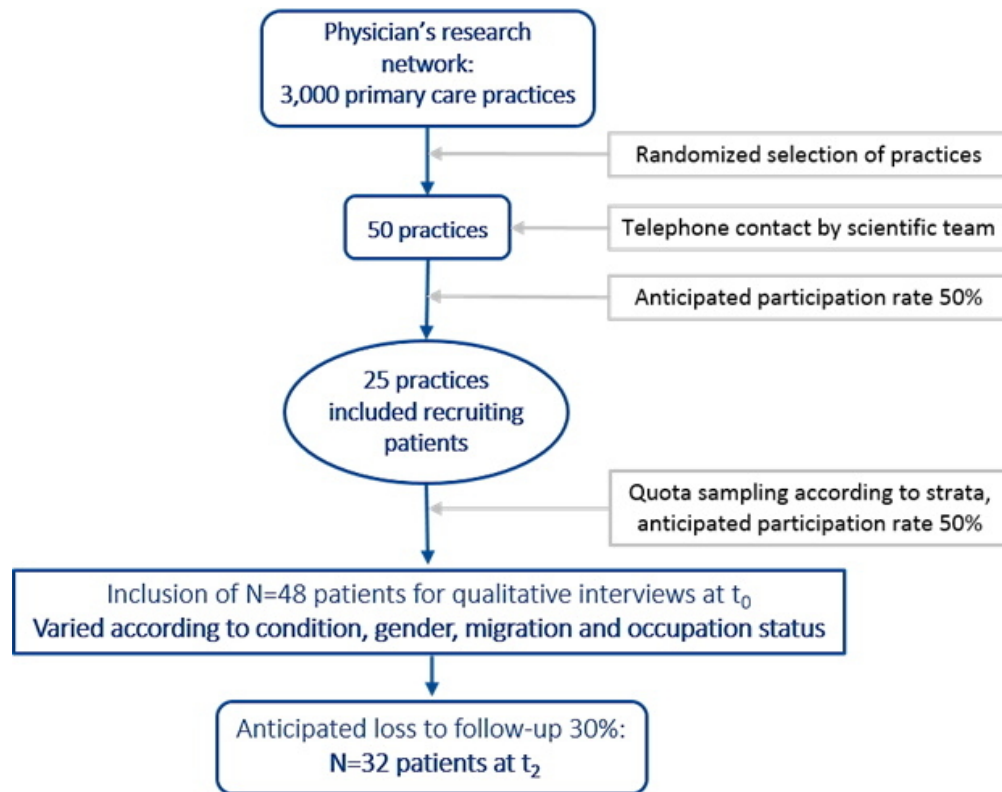

Figure 2: Two-stage recruitment process of patients for the qualitative interviews via primary care practices in Hamburg

164x129mm (96 x 96 DPI)

# BMJ Open

## Social inequalities in aggravating factors of somatic symptom persistence (SOMA.SOC): study protocol for a mixed method observational study focussing on irritable bowel syndrome and fatigue

|                                 |                                                                                                                                                                                                                                                                                      |
|---------------------------------|--------------------------------------------------------------------------------------------------------------------------------------------------------------------------------------------------------------------------------------------------------------------------------------|
| Journal:                        | <i>BMJ Open</i>                                                                                                                                                                                                                                                                      |
| Manuscript ID                   | bmjopen-2022-070635.R2                                                                                                                                                                                                                                                               |
| Article Type:                   | Protocol                                                                                                                                                                                                                                                                             |
| Date Submitted by the Author:   | 11-Apr-2023                                                                                                                                                                                                                                                                          |
| Complete List of Authors:       | von dem Knesebeck, Olaf; University Medical Center Hamburg-Eppendorf, Institute of Medical Sociology<br>Barbek, Rieke; University Medical Center Hamburg-Eppendorf, Institute of Medical Sociology<br>Makowski, Anna; University Medical Center Hamburg-Eppendorf, Medical Sociology |
| <b>Primary Subject Heading</b>: | Public health                                                                                                                                                                                                                                                                        |
| Secondary Subject Heading:      | Sociology                                                                                                                                                                                                                                                                            |
| Keywords:                       | EPIDEMIOLOGIC STUDIES, PUBLIC HEALTH, QUALITATIVE RESEARCH, SOCIAL MEDICINE                                                                                                                                                                                                          |
|                                 |                                                                                                                                                                                                                                                                                      |

SCHOLARONE™  
Manuscripts

1  
2  
3 **Social inequalities in aggravating factors of somatic symptom persistence (SOMA.SOC): study**  
4 **protocol for a mixed method observational study focussing on irritable bowel syndrome and**  
5 **fatigue**  
6  
7

8  
9 Olaf von dem Knesebeck<sup>1\*</sup>, Rieke Barbek<sup>1</sup>, Anna Makowski<sup>1</sup>

10  
11 <sup>1</sup>Institute of Medical Sociology, University Medical Center Hamburg-Eppendorf, Martinistr. 52, 20246  
12 Hamburg, Germany  
13

14  
15  
16 \*Correspondence to:

17 Olaf von dem Knesebeck

18 o.knesebeck@uke.de  
19  
20

21  
22  
23 Word count (main text): 4,163; tables: 3; figures: 2  
24  
25  
26  
27  
28  
29  
30  
31  
32  
33  
34  
35  
36  
37  
38  
39  
40  
41  
42  
43  
44  
45  
46  
47  
48  
49  
50  
51  
52  
53  
54  
55  
56  
57  
58  
59  
60

For peer review only

## Abstract

**Introduction:** Some studies indicate that persistent somatic symptoms (PSS) are more prevalent among individuals with a low socioeconomic status (SES) and a migration background. However, factors explaining social inequalities in PSS are largely unknown. It is expected that aggravating factors of PSS like illness perception, illness beliefs (health literacy, stigma), illness behaviour, and health anxiety may play an important role for this explanation. The SOMA.SOC study will examine social inequalities (according to SES and migration) in factors contributing to symptom persistence in irritable bowel syndrome (IBS) and fatigue.

**Methods and analysis:** The project will collect both quantitative and qualitative data. Quantitative data will be gathered via a representative telephone survey in Germany (N=2,400). A vignette design will be used depicting patients varying in sex, condition (IBS/fatigue), occupational status (low/high), and migration (yes/no). In the survey, we will assess public knowledge and beliefs (e.g. health literacy), attitudes (stigma), and personal experiences with the condition (e.g. somatic symptom burden). Complementary, longitudinal qualitative interviews will be conducted with patients (n=32 at three time points, resulting in N=96 interviews) who will also vary according to sex, condition, occupational status and migration. Patients will be recruited from primary care practices in Hamburg. The interviews will cover origin and development of the condition, coping and help-seeking as well as social interactions and perception of the disease by others (e.g. perceived stigma). SOMA.SOC is part of the interdisciplinary SOMACROSS (Persistent SOMAtic Symptoms ACROSS Diseases) research unit.

**Ethics and dissemination:** The study protocol was approved by the Ethics Committee of the Hamburg Medical Association on 25 January 2021 (reference number: 2020-10194- BO-ff). Informed consent will be obtained from all participants. The main findings will be submitted for publication in peer-reviewed journals within 12 months of study completion.

**Keywords:** social inequalities, socioeconomic status, migration, somatic symptoms, symptom persistence, mixed methods, SOMACROSS



### Strengths and limitations of this study

- Social inequalities according to socioeconomic status and migration in a range of aggravating factors (illness perception, symptom beliefs, illness/treatment experiences, illness behaviour, and health anxiety) in irritable bowel syndrome (IBS) and fatigue will be explored.
- By combining quantitative and qualitative data, we expect a better and more comprehensive understanding of inequalities in aggravating factors of persistent somatic symptoms (PSS).
- With the longitudinal design of the qualitative study part, we expect to gain insight into the course of symptoms and changes of experiences over time.
- Due to the observational design, causal conclusions cannot be drawn from the study.
- As the study is focussed on IBS and fatigue, results cannot be generalized to other PSS.

For peer review only

## Introduction

### Background

#### *Health inequalities according to socioeconomic status and migration*

National and international studies in social epidemiology have consistently shown that socioeconomic status (SES, i.e. education, income, and/or occupational position) as well as migration and ethnicity are important social determinants of health.<sup>[1,2]</sup> Accordingly, people with a low SES generally experience worse health and wellbeing as well as higher morbidity (including higher risk of chronic disease course) and mortality rates than those with a high SES. Material (e.g. material deprivation, unfavourable working, housing, and neighbourhood conditions), psychosocial (e.g. social isolation, psychosocial stress, coping resources) and behavioural factors (e.g. smoking, exercise, alcohol consumption, nutrition) contribute to the explanation of such health inequalities. Recent studies indicate that differences in knowledge and beliefs about health and illness (“health literacy”) are also important for the explanation of health inequalities.<sup>[3,4]</sup> However, results on the explanatory contribution of these factors are inconsistent as there is variation according to the disease under study. For example, socioeconomic inequalities of coronary heart disease can largely be explained by differences in classic cardiovascular risk factors (i.e. high blood pressure, high cholesterol, diabetes mellitus, and cigarette smoking)<sup>[5]</sup>, while poorer coping styles, ongoing life events, stress exposure, and weaker social support are important factors to explain the higher prevalences of mental disorders in lower SES groups.<sup>[6,7]</sup>

Although migrants are often, at least initially, relatively healthy compared with the non-migrant population in the host country, available data suggest that they tend to be more vulnerable to certain communicable diseases, occupational health hazards, injuries, poor mental health, and maternal and child health problems.<sup>[2,8]</sup> Studies furthermore show that there are large differences between migrants in terms of their socioeconomic situation but these differences and their health-related consequences are far from being adequately understood. As migration status and SES reflect different aspects of social inequalities, that are not independent, it is reasonable to explore both aspects and their relation to health simultaneously.<sup>[9]</sup>

#### *Social inequalities in somatic symptoms*

Regarding persistent somatic symptoms (PSS), there are a few studies investigating inequalities according to SES and migration. Using German population survey data, Hinz et al.<sup>[10]</sup> found that a low SES is associated with a higher risk for somatic symptoms measured with the Patient Health Questionnaire (PHQ-15).<sup>[11]</sup> This result was confirmed by an analysis of the Gutenberg Health Study conducted in the Rhine-Main-Region.<sup>[12]</sup> Based on the German national Cohort study, Morawa et al.<sup>[13]</sup> showed that persons of Turkish origin report more symptoms according to the PHQ-15 compared to Germans. Moreover, psychiatric patients with a migration background had a significantly higher current symptom load, especially by somatic symptoms, compared to those without migration background.<sup>[14]</sup>

Thus, overall, results suggest that somatic symptoms are more prevalent among individuals with a low SES and a migration background in Germany. Respective empirical studies mostly use sum scales comprising a number of symptoms but magnitude and mechanisms of inequalities may differ depending on symptom under study. Considering specific PSS with high prevalence such as fatigue

1  
2  
3 (about 30% in Germany<sup>[15,16]</sup>) or irritable bowel syndrome (IBS, about 10-20% in Germany<sup>[17]</sup>), research  
4 on inequalities is scarce, particularly in Germany. Jason et al.<sup>[18]</sup> found highest levels of fatigue among  
5 minority groups and persons with lower levels of education and occupational status in the US. A  
6 German population study also revealed increased rates of fatigue among low SES groups.<sup>[16]</sup> Another  
7 study indicates that there are interactions between SES and ethnicity in the association with fatigue.<sup>[19]</sup>  
8 In terms of IBS, there are studies showing higher prevalences in lower SES groups<sup>[20]</sup> but others find a  
9 reverse association or no socioeconomic inequalities.<sup>[21-23]</sup> There is a paucity of data on differences  
10 according to migration status in the epidemiology of IBS.  
11  
12  
13

#### 14 *Associations between social inequalities and aggravating factors of PSS*

15  
16 Aetiological models suggest that psychosocial, behavioural, and biomedical factors, as well as their  
17 interaction, contribute to the persistence and aggravation of somatic symptom burden.<sup>[24]</sup> Among  
18 known psychosocial maintaining or aggravating factors in PSS are health anxiety, treatment  
19 experiences, and illness beliefs, perception and behaviour. We expect that these factors may partially  
20 mediate any differences that might be seen in rates of PSS between those with differential  
21 socioeconomic or migration status. However, empirical studies analysing associations between social  
22 inequalities and aggravating factors are scarce and thus, there is not much known about the  
23 mechanisms that potentially can explain inequalities in PSS.  
24  
25  
26

27  
28 Studies on illness beliefs examine to what extent an illness is recognized as such and what beliefs about  
29 the causes, the course and the treatment of this illness are prevalent among the public. In recent years,  
30 these studies have been discussed with reference to the concept of health literacy. Health literacy  
31 entails “the public’s knowledge, motivation, and competence to access, understand, appraise, and  
32 apply health information in order to make judgments and take decisions in everyday life concerning  
33 healthcare”.<sup>[25]</sup> Deficits in health literacy mean that people do not know what they can do for  
34 prevention, delay or avoid seeking treatment, view recommended treatments with suspicion, or are  
35 unsure how to assist those afflicted.<sup>[26]</sup> Limited health literacy has been found among people with a  
36 low SES and migrant background.<sup>[4,27,28]</sup> For example, a study analysing differences between German  
37 and Turkish patients suffering from somatoform disorders showed that Turkish patients believed  
38 significantly stronger in supernatural causes of their disease.<sup>[29]</sup> These beliefs reduced the motivation  
39 to take up psychotherapy. A lack of health literacy has been found to be associated with negative  
40 attitudes towards persons with mental illness,<sup>[28]</sup> which can be conceptualized as public stigma. This  
41 entails reactions of the general public towards a group based on stereotypes about this group. In this  
42 regard, results suggest that respondents with higher SES desire less social distance from the mentally  
43 ill and express more liberal views.<sup>[30]</sup> Research also suggests that public stigma is perceived and often  
44 internalized by the persons afflicted. Perceived and internalized stigma have been found to predict  
45 worse health outcomes among IBS patients.<sup>[31]</sup> With regards to fatigue, studies report higher levels of  
46 perceived stigma when compared to IBS<sup>[32]</sup> and participants report feelings of estrangement and the  
47 belief that others attribute fatigue solely to psychological causes.<sup>[33]</sup>  
48  
49  
50  
51  
52  
53  
54

55 Only few studies examined inequalities in symptom or illness perception and health anxiety. In terms  
56 of the former, perceived symptom burden seems to be positively associated with education,<sup>[34]</sup> while  
57 results on differences according to ethnicity and migration are inconsistent.<sup>[34,35]</sup> As for health anxiety,  
58 a recent meta-analysis showed a lower risk for health anxiety in people with higher socioeconomic  
59 status.<sup>[36]</sup> Another meta-analysis indicated a higher risk of health anxiety in migrants and ethnic  
60

1  
2  
3 minorities compared to the majority population in North America.<sup>[37]</sup> Regarding illness behaviour,  
4 reviews from Germany overall indicate a lower utilization of health care among migrants, although the  
5 results vary in terms of health care sector, indicator of health care utilization and migrant population  
6 under study.<sup>[38]</sup> Low SES groups show lower utilization regarding medical specialist consultations and  
7 prevention services.<sup>[39]</sup>  
8  
9

## 10 11 12 **Objectives and hypotheses**

13  
14 Against this background, the present study, Social inequalities in aggravating factors of somatic  
15 symptom persistence (SOMA.SOC), was developed. The objective of the study is to examine social  
16 inequalities (according to SES and migration) in factors contributing to symptom persistence in IBS and  
17 fatigue. We chose these two specific conditions as they appear relatively frequently in the German  
18 population. In terms of IBS, we especially refer to the cardinal symptoms of recurrent abdominal pain  
19 and altered bowel movements (as specified in the International Classification of Diseases 10<sup>th</sup> Edition,  
20 ICD-10<sup>[40]</sup>). Regarding fatigue, different symptoms like emotional and cognitive limitations (e.g. lack of  
21 motivation and reduced performance) as well as physical complaints (e.g. muscular weakness) are to  
22 be considered (as mentioned in the national guideline<sup>[15]</sup> and covered in the ICD-10<sup>[40]</sup>). The following  
23 aggravating factors will be explored: illness perception, knowledge and beliefs about the symptoms,  
24 illness and treatment experiences, illness behaviour, and health anxiety.  
25  
26  
27  
28  
29

30 More specifically the following hypotheses will be explored: 1) SES and migration are associated with  
31 factors contributing to the symptom persistence (aggravating factors) of IBS and fatigue. 2) There are  
32 differences in public perceptions of and public beliefs about IBS and fatigue according to the SES and  
33 migration status of the person expressing the symptoms.  
34  
35

36 The SOMA.SOC study is part (project 6) of the interdisciplinary research unit Persistent SOMATIC  
37 symptoms ACROSS diseases — from risk factors to modification (SOMACROSS). SOMACROSS aims to  
38 identify disease-overarching and disease-specific biopsychosocial risk factors and mechanisms for the  
39 persistence of somatic symptoms.<sup>[41]</sup> SOMACROSS proposes a biopsychosocial 'PSS working model' as  
40 a starting point for the investigation of risk factors and aetiological mechanisms, based on the model  
41 by Henningsen et al.<sup>[24]</sup> The integration of the objectives of the SOMA.SOC project into the working  
42 model of SOMACROSS is shown in Figure 1 (objectives of the SOMA.SOC study are framed in red).  
43 Accordingly, specific focus will be on sociodemographic predisposing factors and psychosocial  
44 maintaining/aggravating factors (Figure 1).  
45  
46  
47  
48  
49

## 50 51 **Methods and analysis**

### 52 **Study design and participants**

53  
54 In order to gain insight in social inequalities in aggravating factors of IBS and fatigue, the project will  
55 make use of a mixed methods design by collecting both quantitative and qualitative observational  
56 data. For a better understanding of the methods, in the following, these two study parts (population  
57 survey and qualitative interviews with patients) will be presented separately. The conditions under  
58 study will be conceptualized differently in the two study parts: While we will use vignettes describing  
59 a person with typical symptoms of IBS or fatigue in the population survey, patients diagnosed with one  
60

of the conditions will be recruited for the qualitative interviews. Data collection started in April 2022 and will be finalized in summer 2024.

### *Design of the population survey*

To explore public knowledge, beliefs, attitudes, and experiences regarding PSS in the case of IBS and fatigue, a cross-sectional population survey will be conducted throughout Germany via computer-assisted telephone interviewing (CATI). In the beginning of the interview, a case story (vignette) will be presented to the respondents. In the vignette, a person with signs and symptoms indicative of either IBS or fatigue will be described. The vignettes will be varied according to sex (male/female), occupational status (high (lawyer)/low (cleaner)), and migration status (yes/no), resulting in 16 different case stories (see Table 1 for an overview of the varied factors and Table 2 for resulting vignettes). The vignettes will be designed in cooperation with clinical experts. By combining a vignette design with a survey, social inequalities may be examined from two perspectives: first, as social characteristics of the respondents themselves (please see above, hypothesis 1) and second, of the person described in the vignette (hypothesis 2). In terms of the first hypothesis, associations between social characteristics of the respondents and aggravating factors (e.g. illness and treatment experiences, illness behaviour, health anxiety) will be analysed, while for the second hypothesis, differences in perceptions, attitudes, and beliefs according to migration and occupational status of the person in the vignette will be examined.

### *Participants of the population survey*

The survey is going to be representative of the resident population in Germany aged 18 years and older, and utilizes a dual-frame approach, i.e. 30% of the gross sample consists of mobile numbers, while 70% will be selected from landline numbers. Thus, there is greater chance of including mobile-only users as well as target groups otherwise hard to reach. Landline numbers will be drawn from all registered private numbers at random. Additional computer-generated numbers will also allow for ex-directory household. For interviews in households with more than one potential target person, a random selection of the target person is realized using the Kish-Selection-Grid.<sup>[42]</sup> Regarding mobile telephone connections, the interview will be conducted with the person answering the phone. To gain a representative sample of the adult population living in Germany, data will be weighted by using an approach that includes a correction for household sizes, selection probabilities and distributions of specific socio-demographic characteristics.<sup>[43]</sup> A total of N = 2,400 participants will be included in the national telephone survey. The 16 vignettes will be randomly assigned to the respondents (n = 150 per vignette). A sample size calculation showed that this number is sufficient to identify small sized differences with a statistical power of 80% and a Type-I error of 0.05 when comparing two vignettes (hypothesis 2) with regards to categorical outcomes using  $\chi^2$ -tests. As for continuous outcomes, a sample size of n = 150 per vignette allows for the detection of small to medium effect sizes based on t-tests, linear regression models, or analyses of variance (statistical power 80%, Type-I error = 0.05). Moreover, based on previous studies with a similar design,<sup>[44-46]</sup> this number of respondents was found to be adequate to detect significant differences in public beliefs between vignettes. Similar surveys with a vignette design resulted in response rates between 48% and 54%.<sup>[44-46]</sup>

### *Design of the qualitative interviews*

To complement the population perspective and to analyse social inequalities in factors and mechanisms of symptom persistence among patients with IBS and fatigue, qualitative, semi-structured interviews will be conducted using a longitudinal design. Longitudinal qualitative research (LQR) is distinct from other qualitative approaches in the way that it incorporates time into the research

1  
2  
3 process. It opens the possibility to make change (or stability) a key focus in analysis.<sup>[47]</sup> LQR aims at  
4 answering questions regarding lived experiences, e.g. during the course of diseases, and how and why  
5 these experiences change over time. Against the background of the ongoing process of persistence of  
6 somatic symptoms, LQR will be helpful to capture individual courses, narratives and trajectories.  
7 Accordingly, interviews will be conducted at three measurement points (at the time of inclusion (t0),  
8 after 6 months (t1), and after 12 months (t2)).  
9

### 10 *Participants of the qualitative interviews*

11  
12 Patients will be recruited from primary care practices in the Hamburg region and will be selected  
13 according to condition (IBS/fatigue), sex (male/female), occupational status (high/low), and migration  
14 status (yes/no). With respect to the occupational status of patients, the International Socio-Economic  
15 Index of Occupational Status (ISEI) according to Ganzeboom et al.<sup>[48]</sup> will be used as a criterion for  
16 assigning scores. Scores will be dichotomized to obtain groups of high and low occupational position.  
17 Regarding the patients' migration history, we will be adapting the definition of the German Federal  
18 Statistical Office. This states that "A person has a migration background if he or she or at least one  
19 parent was not born with German citizenship".<sup>[49]</sup> For recruitment of the patients, the authors will  
20 cooperate with the Department of General Practice and Primary Care at the University Medical Center  
21 Hamburg-Eppendorf, which established a physicians' research network. Physicians are listed in a  
22 database that includes contact details of all primary care physicians residing in Hamburg and its  
23 suburbs as well as in adjacent regions (overall about 3,000 primary care physicians). The database  
24 holds information on contact data, structure of the practice (single vs. group practice), physician staff  
25 and involvement in recent research projects. 50 practices will be randomly selected and contacted  
26 (Figure 2). If interested in participation, the practice will receive a detailed study information, a process  
27 description, and a declaration of consent to participate. Moreover, the participating practices will be  
28 provided with all necessary study materials to be handed out to patients (e.g. study information,  
29 privacy statement, short questionnaire to collect necessary patient data (e.g. name, condition, sex,  
30 age, occupation, contact information)).  
31  
32  
33  
34  
35

36 Patients will be selected based on a purposeful sampling procedure according to the four strata  
37 mentioned above (condition, sex, occupational status, and migration). This procedure was chosen as  
38 it is expected to be useful to analyse social inequalities in factors and mechanisms of symptom  
39 persistence. Doctors are asked to inform patients who meet the diagnostic criteria (K58.1 (IBS-D),  
40 K58.2 (IBS-C), K58.3 (IBS-M), K58.8, R53, F48.0, or G93.3 according to ICD-10<sup>[40]</sup>) about the study when  
41 they present in the practice. Those patients who are interested in participation are requested to return  
42 a short questionnaire with all relevant information about eligibility including contact details to the  
43 project group (either via mail, e-mail or fax). Returned questionnaires will be sorted according to strata  
44 (condition, sex, migration status, occupational position). Thereafter, telephone calls will be conducted  
45 to provide further information if needed and to arrange an interview appointment. Informed consent  
46 will be signed by all participating patients. Participants will be free to conduct the interviews in person  
47 or by telephone. To acknowledge their participation and compensate for expenses, each patient will  
48 receive 15€ for each completed interview (i.e. 45€ for the three interviews).  
49  
50  
51  
52

53 Based on experiences in previous projects, we expect a participation rate of at least 50% of the  
54 randomly selected practices.<sup>[50]</sup> This will lead to around 25 practices taking up patient recruitment.  
55 Physicians will receive 50€ per patient included in the study. We also estimate the participation rate  
56 of the addressed patients at 50%, meaning that the practices will have to contact 96 patients (around  
57 four patients per practice in six months), leading to 48 patients with the required combination of  
58 characteristics who supply informed consent to participate. This will allow for a drop-out rate of  
59 approximately 30% among participants during the course of the study, resulting in n = 32 patients who  
60



1  
2  
3 will be included in all three measurement points (see Figure 2). For each of the 16 combinations  
4 (IBS/fatigue), sex (male/female), migration (yes/no), and occupational status (high/low), two semi-  
5 structured interviews will be conducted. This sampling procedure will result in an equal number of  
6 patients (n = 16) in terms of condition, sex, occupational status, and migration status interviewed at  
7 three measurement points. Thus, altogether 96 interviews will be conducted.  
8  
9

## 11 **Assessment and study outcomes**

### 13 *Population survey*

15 The standardized questionnaire used in the telephone survey will cover the following topics: (1)  
16 questions referring to knowledge and beliefs about IBS or fatigue, (2) attitudes towards persons  
17 affected from IBS or fatigue (stigma), (3) personal experiences with these symptoms, and (4)  
18 sociodemographic characteristics of respondents (also see Table 3<sup>[51-54]</sup>). As for social inequalities,  
19 highest educational attainment, occupational position, monthly equivalence household income, and  
20 migration status (no migration background, 1<sup>st</sup> and 2<sup>nd</sup> generation migrants) will be assessed.<sup>[55]</sup> In  
21 Germany, about 25% of the general population have a migration background. Accordingly, in our  
22 sample (N=2,400), we expect about 600 respondents to have a migration background. In terms of  
23 knowledge and beliefs about IBS or fatigue, health literacy, illness perceptions, and illness beliefs will  
24 be measured. Regarding personal experiences with the symptoms, questions about illness behaviour,  
25 illness and treatment experiences, somatic symptom burden, and health anxiety will be included.  
26  
27

### 29 *Qualitative patient interviews*

31 Semi-structured interviews will be conducted personally or by telephone (according to patient  
32 preference). To this end, a blend of closed and open-ended questions will be used that can be  
33 accompanied by follow-up questions to further specify mentioned topics. The precise formulation and  
34 order of the questions can be varied. This will allow to cover the main issues with all participants while  
35 also offering flexibility in discussing issues pertinent to individuals. The interviews will have a length of  
36 about 30 minutes and will be audio-recorded upon permission of the patient. A total of three sections  
37 are planned for the interview guide:  
38  
39

40 (1) Origin, causes and development of the disease: Here, aspects of symptom/illness perception as well  
41 course and severity of symptoms and aspects of health anxiety will be covered.

42 (2) Coping with the illness and help-seeking: In this segment, illness behaviour and experiences, health  
43 literacy as well as treatment experiences and treatment expectations will be focused.

44 (3) Social interaction and perception by others: This complex will cover disclosure of illness and  
45 (perceived) stigma associated with the disorder.  
46  
47  
48  
49  
50

## 51 **Data analyses**

### 53 *Population survey*

55 Associations between social characteristics of the respondents and aggravating factors will be analysed  
56 by calculating regression models (hypothesis 1). Furthermore, structural equation model approaches  
57 will be utilized to explore to what extent social inequalities in PSS are mediated by the aggravating  
58 factors under study and to what extent variance is mediated by other (unconsidered) factors.  
59 Differences in public perceptions, attitudes, and beliefs according to migration and occupational status  
60

1  
2  
3 of the person in the vignette (hypothesis 2) will be examined using analyses of variance. The power  
4 calculation showed that the sample size is sufficient to detect significant main effects (e.g. of migration  
5 status of the person in the vignette) as well as two-way interactions (e.g. between migration and  
6 occupational status). In terms of the latter, interaction tests will be performed. Regarding categorical  
7 outcomes (e.g. recognition of condition presented in the vignette (yes or no)),  $\chi^2$ -tests will be applied.  
8 Missing data will be imputed if more than 5% of the data are missing. The number of imputations will  
9 be chosen dependent on the proportion of missing data.  
10  
11

### 12 *Qualitative patient interviews*

14 Subject to the consent of the participants, the interviews will be audio-recorded. Uniform transcription  
15 rules will be established before the start of the analysis, and compliance with these rules will be  
16 checked several times during the course of the process. For the analysis of the transcribed interviews,  
17 qualitative content analysis (QCA) will be used. A core aspect of QCA is to make the interpretation of  
18 text describable and verifiable by using content analysis rules previously formulated on the basis of a  
19 work plan. The technique of inductive category formation is particularly suitable for this study design.  
20 Inductive categories are developed from the interview material according to a given definition  
21 criterion, in order to reach the central aspects of the text. Step by step, categories will be formulated,  
22 which are revised within feedback loops eventually reduced to main categories and checked in respect  
23 to their reliability.<sup>[56]</sup>  
24  
25

### 26 *Mixed methods integration*

28 Although data from both study parts are collected and analysed separately, they are seen as two  
29 complementing perspectives on social aspects that contribute to the symptom persistence of IBS and  
30 fatigue. In using these different approaches, we expect a better and more comprehensive  
31 understanding of inequalities in aggravating factors of PSS and how they are associated with patients'  
32 and the public's characteristics. Integration of findings of the two study parts will be feasible as there  
33 are overlaps in design (variation of social characteristics) and content of the survey/interview (please  
34 see assessment and study outcomes). The process of integrating findings from the two methods will  
35 take place at the interpretation stage when both data sets have been analysed separately. Accordingly,  
36 findings from the two components of the study will be listed in a "convergence coding matrix".<sup>[57]</sup> That  
37 means, it will be considered where results from the two study parts agree, offer complementary  
38 information on the same issue, or seem to contradict each other.  
39  
40  
41  
42  
43

### 44 **Patient and public involvement**

45 None.  
46  
47  
48  
49

### 50 **Ethics and dissemination**

51 The study is based on data of personal or telephone interviews. Thus, ethical and legal considerations  
52 are focused on data protection. We will strictly adhere to data protection regulations. Informed  
53 consent will be obtained from all participants. Respondents will be informed that participation in the  
54 study is voluntary and that withdrawal is possible at any time. There are no specific risks for the  
55 participants in the study. The study protocol was approved by the Ethics Committee of the Hamburg  
56 Medical Association on 25 January 2021 (reference number: 2020-10194- BO-ff), including financial  
57 compensations for patients and physicians.  
58  
59  
60



1  
2  
3 In accordance with the ethics committee approval and the German Research Foundation (DFG)  
4 guidelines for the handling of research data, deidentified quantitative individual data will be made  
5 publicly available. Data sharing will follow the FAIR Data Principles (Findable, Accessible, Interoperable  
6 and Reusable). The main findings will be submitted for publication in peer-reviewed journals within 12  
7 months of study completion.  
8  
9  
10  
11  
12  
13  
14  
15  
16  
17  
18  
19  
20  
21  
22  
23  
24  
25  
26  
27  
28  
29  
30  
31  
32  
33  
34  
35  
36  
37  
38  
39  
40  
41  
42  
43  
44  
45  
46  
47  
48  
49  
50  
51  
52  
53  
54  
55  
56  
57  
58  
59  
60

For peer review only

1  
2  
3 **Acknowledgements:** We would like to acknowledge the continued contributions of all colleagues of  
4 the Research Unit 5211 'SOMACROSS' (FOR 5211) to the design of this study.  
5

6 **Contributors:** OvdK and AM developed the study. OvdK is the principal investigator of the study. RB  
7 is research associate in the study. All authors contributed to the refinement of the study protocol,  
8 read and approved the final version.  
9

10 **Funding:** The SOMA.SOC study is supported by the German Research Foundation (Deutsche  
11 Forschungsgemeinschaft, DFG) (project number: 445297796, please see  
12 <https://gepris.dfg.de/gepris/projekt/460374208?language=en>). It is part of the collaborative research  
13 unit 5211 (RU 5211) 'Persistent SOMAtic symptoms ACROSS diseases: from risk factors to  
14 modification (SOMACROSS)', also funded by the DFG (spokesperson: Professor Bernd Löwe, MD).  
15  
16

17 **Competing interests:** None declared.  
18

19 **Patient consent for publication:** Not applicable.  
20

21 **Provenance and peer review:** The manuscript underwent peer-review. Moreover, there was peer  
22 review for ethical and funding approval prior to submission.  
23  
24  
25  
26  
27  
28  
29  
30  
31  
32  
33  
34  
35  
36  
37  
38  
39  
40  
41  
42  
43  
44  
45  
46  
47  
48  
49  
50  
51  
52  
53  
54  
55  
56  
57  
58  
59  
60

## References

1. Marmot M. Social determinants of health inequalities. *Lancet*. 2005;365:1099–104.
2. Rechel B, Mladovsky P, Ingleby D, et al. Migration and health in an increasingly diverse Europe. *Lancet*. 2013;381:1235–45.
3. World Health Organization. Health Literacy. The Solid Facts [Internet]. 2013. Available from: <https://apps.who.int/iris/bitstream/handle/10665/128703/e96854.pdf>
4. von dem Knesebeck O, Mnich E, Daubmann A, et al. Socioeconomic status and beliefs about depression, schizophrenia and eating disorders. *Soc Psychiatry Psychiatr Epidemiol*. 2013;48(5):775–82.
5. Kivimäki M, Shipley MJ, Ferrie JE, et al. Best-practice interventions to reduce socioeconomic inequalities of coronary heart disease mortality in UK: a prospective occupational cohort study. *Lancet*. 2008;372(9650):1648–54.
6. Lorant V, Deliège D, Eaton W, et al. Socioeconomic inequalities in depression: A meta-analysis. *Am J Epidemiol*. 2003;157(2):98–112.
7. Muntaner C, Eaton WW, Miech R, et al. Socioeconomic position and major mental disorders. *Epidemiol Rev*. 2004;26:53–62.
8. Razum O, Karrasch L, Spallek J. [Migration. A neglected dimension]. *Bundesgesundheitsblatt - Gesundheitsforsch - Gesundheitsschutz*. 2016;59:259–65.
9. Malmusi D, Borrell C, Benach J. Migration-related health inequalities: Showing the complex interactions between gender, social class and place of origin. *Soc Sci Med*. 2010;71(9):1610–9.
10. Hinz A, Ernst J, Glaesmer H, et al. Frequency of somatic symptoms in the general population: Normative values for the Patient Health Questionnaire-15 (PHQ-15). *J Psychosom Res*. 2017;96(August 2011):27–31.
11. Kroenke K, Spitzer RL, Williams JBW, et al. The Patient Health Questionnaire Somatic, Anxiety, and Depressive Symptom Scales: A systematic review. *Gen Hosp Psychiatry*. 2010;32(4):345–59.
12. Beutel ME, Wiltink J, Kerahrodi JG, et al. Somatic symptom load in men and women from middle to high age in the Gutenberg Health Study - association with psychosocial and somatic factors. *Sci Rep*. 2019;9(4610):1–9.
13. Morawa E, Dragano N, Jöckel K-H, et al. Somatization among persons with Turkish origin: Results of the pretest of the German National Cohort Study. *J Psychosom Res*. 2017;96:1–9.
14. Brandl EJ, Dietrich N, Mell N, et al. Clinical and sociodemographic differences between patients with and without migration background in a psychiatric outpatient service. *Psychiatr Prax*. 2018;45:367–74.
15. Baum E, Donner-Banzhoff N, Maisel P. [Fatigue] [S3-Guideline]. 2017.
16. Kocalevent RD, Hinz A, Brähler E, et al. Determinants of fatigue and stress. *BMC Res Notes*. 2011;4(238).
17. [Federal Ministry of Health]. [Irritable Bowel Syndrome] [Internet]. 2020. Available from: <https://gesund.bund.de/reizdarmsyndrom>
18. Jason LA, Richman JA, Rademaker AW, et al. A community-based study of Chronic Fatigue Syndrome. *Arch Intern Med*. 1999;159:2129–37.
19. Bardwell WA, Burke SC, Thomas KS, et al. Fatigue varies by social class in African Americans but not Caucasian Americans. *Int J Behav Med*. 2006;13(3):252–8.
20. Spiegel BMR. The burden of IBS: Looking at metrics. *Curr Gastroenterol Rep*. 2009;11:265–9.
21. Canavan C. The epidemiology of irritable bowel syndrome. *Clin Epidemiol*. 2014;6:71–80.
22. Lovell RM, Ford AC. Global prevalence of and risk factors for irritable bowel syndrome: A meta-analysis. *Clin Gastroenterol Hepatol*. 2012;10:712–21.

23. Howell S, Talley N, Quine S, et al. The irritable bowel syndrome has origins in the childhood socioeconomic environment. *Am J Gastroenterol*. 2004;99(8):1572–8.
24. Henningsen P, Zipfel S, Sattel H, et al. Management of functional somatic syndromes and bodily distress. *Psychother Psychosom*. 2018;87:12–31.
25. Sørensen K, Van Den Broucke S, Fullam J, et al. Health literacy and public health: A systematic review and integration of definitions and models. *BMC Public Health*. 2012;12(1).
26. Jorm AF. Mental health literacy: empowering the community to take action for better mental health. *Am Psychol*. 2012;67(3):231–43.
27. Bostock S, Steptoe A. Association between low functional health literacy and mortality in older adults: longitudinal cohort study. *BMJ Open*. 2012;344(e1602):1–10.
28. Holman D. Exploring the relationship between social class, mental illness stigma and mental health literacy using British national survey data. *Health (Irvine Calif)*. 2015;19(4):413–29.
29. Reich H, Bockel L, Mewes R. Motivation for psychotherapy and illness beliefs in Turkish immigrant inpatients in Germany: Results of a cultural comparison study. *J Racial Ethn Heal Disparities*. 2015;2(1):112–23.
30. Angermeyer MC, Dietrich S. Public beliefs about and attitudes towards people with mental illness: A review of population studies. *Acta Psychiatr Scand*. 2006;113(3):163–79.
31. Taft TH, Riehl ME, Dowjotas KL, et al. Moving beyond perceptions: internalized stigma in the irritable bowel syndrome. *Neurogastroenterol Motil*. 2014;26:1026–35.
32. Looper KJ, Kirmayer LJ. Perceived stigma in functional somatic syndromes and comparable medical conditions. *J Psychosom Res*. 2004;57:373–8.
33. Green J, Romei J, Natelson BH. Stigma and Chronic Fatigue Syndrome. *J Chronic Fatigue Syndr*. 1999;5(2):63–75.
34. Luo H, Lindell DF, Jurgens CY, et al. Symptom perception and influencing factors in chinese patients with heart failure: A preliminary exploration. *Int J Environ Res Public Health*. 2020;17(2692).
35. Wilkins SS, Bourke P, Salam A, et al. Functional stroke mimics: Incidence and characteristics at a primary stroke center in the Middle East. *Psychosom Med*. 2018;80:416–21.
36. Barbek R, Makowski A, von dem Knesebeck O. Social inequalities in health anxiety: A systematic review and meta-analysis. *J Psychosom Res*. 2022;153: 960256.
37. Barbek R, Henning S, Ludwig J, et al. Ethnic and migration-related inequalities in health anxiety: A systematic review and meta-analysis. *Front Psychol*. 2022;13:960256.
38. Klein J, von dem Knesebeck O. Inequalities in health care utilization among migrants and non-migrants in Germany: a systematic review. *Int J Equity Health*. 2018;17(160):1–10.
39. Klein J, von dem Knesebeck O. [Social disparities in outpatient and inpatient care. An overview of current findings in Germany]. *Bundesgesundheitsblatt - Gesundheitsforsch - Gesundheitsschutz*. 2016;2:238–44.
40. Deutsches Institut für Medizinische Dokumentation und Information. ICD-10-WHO Version 2019 [Internet]. Available from: <https://www.dimdi.de/static/de/klassifikationen/icd/icd-10-who/kode-suche/htmlamt12019/>
41. Löwe B, Andresen V, Van den Bergh O, et al. Persistent SOMATIC symptoms ACROSS diseases - from risk factors to modification: scientific framework and overarching protocol of the interdisciplinary SOMACROSS research unit (RU 5211). *BMJ Open*. 2022;12(1):e057596.
42. Kish L. A procedure for objective respondent selection within the household. *J Am Stat Assoc*. 1949;44(247):380–7.
43. Kolenikov S. Calibrating survey data using iterative proportional fitting (raking). *Stata J* 2014;14:22-59.

- 1
- 2
- 3 44. Makowski AC, Mnich EE, Ludwig J, et al. Changes in beliefs and attitudes toward people with
- 4 depression and schizophrenia - results of a public campaign in Germany. *Psychiatry Res.*
- 5 2016;237.
- 6
- 7 45. von dem Knesebeck O, Kofahl C, Makowski AC. Differences in depression stigma towards
- 8 ethnic and socio-economic groups in Germany - Exploring the hypothesis of double stigma. *J*
- 9 *Affect Disord.* 2017;208:82–6.
- 10
- 11 46. von dem Knesebeck O, Löwe B, Lehmann M, et al. Public beliefs about somatic symptom
- 12 disorders. *Front Psychiatry.* 2018;9:1–7.
- 13
- 14 47. Calman L, Brunton L, Molassiotis A. Developing longitudinal qualitative designs: Lessons
- 15 learned and recommendations for health services research. *BMC Med Res Methodol.*
- 16 2013;13:14.
- 17
- 18 48. Ganzeboom HBG, De Graaf PM, Treiman DJ. A standard international socio-economic index of
- 19 occupational status. *Soc Sci Res.* 1992;21:1–56.
- 20
- 21 49. destatis. Population with migration background - Results of the microcensus 2019 - Series 1
- 22 Section 2.2. 2020.
- 23
- 24 50. Koens S, Marx G, Gras C, et al. Physicians' information seeking behavior in patients presenting
- 25 with heart failure symptoms – Does gender of physician and patient matter ? *Patient Education*
- 26 *Couns.* 2020;103:2437-2442.
- 27
- 28 51. Broadbent E, Petrie KJ, Main J, et al. The Brief Illness Perception Questionnaire. *J Psychosom*
- 29 *Res.* 2006;60:631–7.
- 30
- 31 52. Jones MP, Keefer L, Bratten J, et al. Development and initial validation of a measure of
- 32 perceived stigma in irritable bowel syndrome. *Psychol Health Med.* 2009;14(3):367–74.
- 33
- 34 53. Gierk B, Kohlmann S, Kroenke K, et al. The Somatic Symptom Scale-8 (SSS-8): A brief measure
- 35 of somatic symptom burden. *JAMA Intern Med.* 2014;174(3):399–407.
- 36
- 37 54. Fink P, Ewald H, Jensen J, et al. Screening for somatization and hypochondriasis in primary care
- 38 and neurological in-patients: A seven-item scale for hypochondriasis and somatization. *J*
- 39 *Psychosom Res.* 1999;46(3):261–73.
- 40
- 41 55. Lampert T, Kroll LE, Müters S, et al. [Measurement of socioeconomic status in the German
- 42 Health Interview and Examination Survey for Adults (DEGS1)]. *Bundesgesundheitsblatt -*
- 43 *Gesundheitsforsch - Gesundheitsschutz.* 2013;56:631–636.
- 44
- 45 56. Mayring P, Brunner E. [Qualitative Content Analysis]. In: Buber R, Holzmüller HH, editors.
- 46 [Qualitative market research: Concepts - Methods - Analyses] 2007. p. 669–80.
- 47
- 48 57. O’Cathain A, Murphy E, Nicholl J. Three techniques for integrating data in mixed methods
- 49 studies. *BMJ* 2010;341:c4587.
- 50
- 51
- 52
- 53
- 54
- 55
- 56
- 57
- 58
- 59
- 60

**Table 1. Factors presented in the vignettes**

| <b>Factor</b>              | <b>Specifications</b>          |                           |
|----------------------------|--------------------------------|---------------------------|
| <b>Condition</b>           | Irritable bowel syndrome (IBS) | Fatigue (Fa)              |
| <b>Sex</b>                 | Male (M)                       | Female (F)                |
| <b>Migration history</b>   | Migration history (Mh)         | No migration history (nM) |
| <b>Occupational status</b> | High (Lawyer, L)               | Low (Cleaner, C)          |

For peer review only

**Table 2. Vignettes presented in the survey**

| Vignette No. | Factor combination |
|--------------|--------------------|
| 1            | IBS M Mh L         |
| 2            | IBS M nM L         |
| 3            | IBS M Mh C         |
| 4            | IBS M nM C         |
| 5            | IBS F Mh L         |
| 6            | IBS F nM L         |
| 7            | IBS F Mh C         |
| 8            | IBS F nM C         |
| 9            | Fa M Mh L          |
| 10           | Fa M nM L          |
| 11           | Fa M Mh C          |
| 12           | Fa M nM C          |
| 13           | Fa F Mh L          |
| 14           | Fa F nM L          |
| 15           | Fa F Mh C          |
| 16           | Fa F nM C          |

For abbreviations of the factor combinations please see Table 1.

**Table 3. Instruments intended to use in the population survey**

|            | Construct              | Indicator/Instrument                                                                                                                     |
|------------|------------------------|------------------------------------------------------------------------------------------------------------------------------------------|
| <b>(1)</b> | Health literacy        | Labelling (recognition of disease); perceived causes; treatability; effectiveness of treatment options                                   |
|            | Illness perception     | Illness Perception Questionnaire (brief version, IPQ-B) <sup>[51]</sup>                                                                  |
|            | Illness belief         | E.g. "Do you think that the person in the vignette has a real disorder?"                                                                 |
| <b>(2)</b> | Public stigma          | Emotional reactions towards those affected by IBS or fatigue<br>Stereotypes ascribed to persons with IBS or fatigue                      |
|            | Anticipated stigma     | Modified version of the IBS Stigma Scale <sup>[52]</sup>                                                                                 |
| <b>(3)</b> | Illness behaviour      | E.g. "If you have the feeling of being affected by such complaints, you should get help as soon as possible."<br>Health care utilization |
|            | Illness experience     | Own affliction; contact to someone affected                                                                                              |
|            | Treatment experience   | Treatment experience                                                                                                                     |
|            | Somatic symptom burden | Somatic Symptom Scale (SSS-8) <sup>[53]</sup>                                                                                            |
|            | Health anxiety         | Whiteley Index (WI-7) <sup>[54]</sup>                                                                                                    |
| <b>(4)</b> | Sociodemographic data  | Age, sex, educational attainment, occupational position, income, migration status, marital status                                        |



1  
2  
3  
4  
5 **Figure 1. Integration of the study objectives into the working model of the Persistent SOMAtic**  
6 **symptoms ACROSS diseases — from risk factors to modification (SOMACROSS) research unit** <sup>[41]</sup>  
7  
8  
9

10 **Figure 2. Two-stage recruitment process of patients for the qualitative interviews via primary care**  
11 **practices in Hamburg**  
12  
13  
14  
15  
16  
17  
18  
19  
20  
21  
22  
23  
24  
25  
26  
27  
28  
29  
30  
31  
32  
33  
34  
35  
36  
37  
38  
39  
40  
41  
42  
43  
44  
45  
46  
47  
48  
49  
50  
51  
52  
53  
54  
55  
56  
57  
58  
59  
60

For peer review only

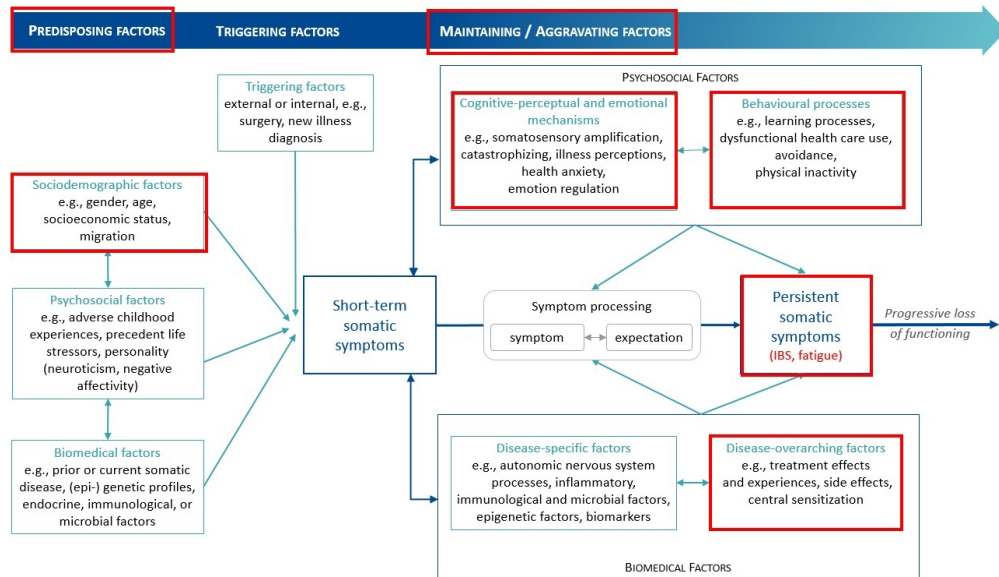

Figure 1: Integration of the study objectives into the working model of the Research unit "Persistent SOMatic symptoms ACROSS diseases – from risk factors to modification (SOMACROSS)" 41

340x200mm (96 x 96 DPI)



Figure 2: Two-stage recruitment process of patients for the qualitative interviews via primary care practices in Hamburg

164x129mm (96 x 96 DPI)
